# Supplementary material for: Immune Cell Composition in Human Non-small Cell Lung Cancer
Source: PubMed Central journal article supplement (PMC6367276; doi:10.3389/fimmu.2018.03101), 2019-02-01
Supplement: Data_Sheet_1.pdf [file Data_Sheet_1.pdf]

# Supplementary Material

## Immune Cell Composition in Human Non-Small Cell Lung Cancer

Branislava Stankovic, Heidi Anine Korsmo Bjørhovde, Renate Skarshaug, Henrik Aamodt, Astri Frafjord, Elisabeth Müller, Clara Hammarström, Kahsai Beraki, Espen S. Bækkevold, Per Reidar Woldbæk, Åslaug Helland, Odd Terje Brustugun, Inger Øynebråten, and Alexandre Corthay

### Table of contents:

|                                                                                                                                      |    |
|--------------------------------------------------------------------------------------------------------------------------------------|----|
| Supplementary Table 1. Antibody mix used to assess T cells in NSCLC patients.....                                                    | 2  |
| Supplementary Table 2. Antibody mix used to assess B cells in NSCLC patients.....                                                    | 2  |
| Supplementary Table 3. Antibody mix used to assess APCs in NSCLC patients.....                                                       | 2  |
| Supplementary Table 4. Antibody mix used to assess NK cells in NSCLC patients.....                                                   | 2  |
| Supplementary Table 5. Antibody mix used to assess granulocyte populations in NSCLC patients.....                                    | 3  |
| Supplementary Table 6. Antibody mix used to assess “Other” populations in NSCLC patients.....                                        | 3  |
| Supplementary Table 7. Correlation between immune cell infiltrates in NSCLC tumor.....                                               | 4  |
| Supplementary Figure 1. No influence of steroid use and COPD on immune cell infiltration in NSCLC .....                              | 5  |
| Supplementary Figure 2. Flow cytometry analysis of T cells in PBMCs from NSCLC patients.....                                         | 6  |
| Supplementary Figure 3. Immunofluorescent staining of CD45RA <sup>+</sup> CD3 <sup>+</sup> cells in NSCLC tumor tissue.....          | 7  |
| Supplementary Figure 4. Percentages of T cells in different tissues from NSCLC patients.....                                         | 8  |
| Supplementary Figure 5. Percentages of T cells in different stages of NSCLC and in patients with<br>different smoking histories..... | 9  |
| Supplementary Figure 6. Flow cytometry analysis of B cell sub-populations in PBMCs from NSCLC patients.....                          | 10 |
| Supplementary Figure 7. Percentages of B cells in adenocarcinoma and squamous cell carcinoma.....                                    | 11 |
| Supplementary Figure 8. Percentages of B cells in different stages of NSCLC.....                                                     | 12 |
| Supplementary Figure 9. Percentages of B cells in NSCLC patients with different smoking histories.....                               | 13 |
| Supplementary Figure 10. Expression of CD11b and CD11c on macrophages and DCs in NSCLC tumor.....                                    | 14 |
| Supplementary Figure 11. Flow cytometry of monocytes and DCs in PBMCs from NSCLC patients.....                                       | 15 |
| Supplementary Figure 12. Percentages of DC subsets and macrophages in different stages of NSCLC.....                                 | 16 |
| Supplementary Figure 13. Percentages of DC subsets in NSCLC adenocarcinoma and<br>squamous cell carcinoma .....                      | 17 |
| Supplementary Figure 14. Proportions of different DC populations in NSCLC.....                                                       | 18 |
| Supplementary Figure 15. Percentages of DC subsets in different tissues from NSCLC patients.....                                     | 18 |
| Supplementary Figure 16. Flow cytometry analysis of NK cells in PBMCs from NSCLC patients.....                                       | 19 |
| Supplementary Figure 17. Flow cytometry analysis of granulocyte populations in PBMCs from NSCLC patients....                         | 20 |
| Supplementary Figure 18. Immune cell infiltrates in NSCLC tumor from patients grouped<br>based on steroid treatment.....             | 21 |
| Supplementary Figure 19. Linear regression analysis of immune cell infiltrates in NSCLC tumor.....                                   | 22 |
| Supplementary Figure 20. Flow cytometry analysis of T cells in lymph node from NSCLC patients.....                                   | 23 |
| Supplementary Figure 21. Flow cytometry analysis of B cells in lymph node from NSCLC patients.....                                   | 24 |
| Supplementary Figure 22. Flow cytometry analysis of macrophages and DCs in lymph node of NSCLC patients....                          | 25 |
| Supplementary Figure 23. Flow cytometry analysis of NK cells in lymph node from NSCLC patients.....                                  | 26 |
| Supplementary Figure 24. Flow cytometry analysis of granulocyte populations in lymph node<br>from NSCLC patients.....                | 27 |
| Supplementary Figure 25. Flow cytometry analysis of “Other” population in squamous cell carcinoma.....                               | 28 |
| Supplementary Figure 26. Flow cytometry analysis of “Other” population in adenocarcinoma.....                                        | 29 |

**Supplementary Table 1. Antibody mix used to assess T cells in NSCLC patients**

| Specificity | Fluorophore  | Clone | Volume | Manufacturer | Cat. No |
|-------------|--------------|-------|--------|--------------|---------|
| CD3         | A488         | UCHT1 | 2.5 µl | Biologend    | 300415  |
| CD4         | PE           | OKT4  | 2.5 µl | Biologend    | 317410  |
| CD8         | APC/Cy7      | SK1   | 2.5 µl | Biologend    | 344714  |
| CD19        | A700         | HIB19 | 1 µl   | Biologend    | 302226  |
| CD45        | Pacific Blue | HI30  | 2.5 µl | Biologend    | 304029  |
| CD45RO      | APC          | UCHL1 | 2.5 µl | Biologend    | 304210  |
| CD45RA      | PE/Cy7       | HI100 | 2.5 µl | Biologend    | 304126  |

**Supplementary Table 2. Antibody mix used to assess B cells in NSCLC patients**

| Specificity | Fluorophore  | Clone  | Volume | Manufacturer | Cat. No |
|-------------|--------------|--------|--------|--------------|---------|
| CD14        | APC/Cy7      | HCD14  | 2.5 µl | Biologend    | 325620  |
| CD38        | APC          | HB-7   | 2.5 µl | Biologend    | 356606  |
| CD19        | PE/Cy7       | HIB19  | 2.5 µl | Biologend    | 302216  |
| CD27        | PE           | O323   | 2.5 µl | Biologend    | 302808  |
| IgD         | A488         | IA6-2  | 2.5 µl | Biologend    | 348216  |
| CD3         | A700         | UCHT1  | 1 µl   | Biologend    | 300424  |
| IgM         | BV605        | MHM-88 | 2.5 µl | Biologend    | 314524  |
| CD45        | Pacific Blue | HI30   | 2.5 µl | Biologend    | 304029  |

**Supplementary Table 3. Antibody mix used to assess APCs in NSCLC patients**

| Specificity | Fluorophore  | Clone     | Volume | Manufacturer    | Cat. No     |
|-------------|--------------|-----------|--------|-----------------|-------------|
| CD11c       | A488         | 3.9       | 2.5 µl | Biologend       | 301618      |
| CD14        | APC/Cy7      | HCD14     | 2.5 µl | Biologend       | 325620      |
| HLA-DR      | PE/Cy7       | L243      | 2.5 µl | Biologend       | 307616      |
| CD141       | APC          | AD5-14H12 | 2.5 µl | Miltenyi Biotec | 130-090-907 |
| CD1c        | PE           | L161      | 2.5 µl | Biologend       | 331506      |
| CD123       | BV605        | 6H6       | 2.5 µl | Biologend       | 306025      |
| CD19        | A700         | HIB19     | 1 µl   | Biologend       | 302226      |
| CD45        | Pacific Blue | HI30      | 2.5 µl | Biologend       | 304029      |

**Supplementary Table 4. Antibody mix used to assess NK cells in NSCLC patients**

| Specificity | Fluorophore  | Clone | Volume | Manufacturer | Cat. No |
|-------------|--------------|-------|--------|--------------|---------|
| CD3         | A488         | UCHT1 | 2.5 µl | Biologend    | 300415  |
| CD19        | BV605        | HIB19 | 2.5 µl | Biologend    | 302244  |
| CD56        | PE           | HCD56 | 2.5 µl | Biologend    | 318305  |
| CD16        | APC          | 3G8   | 2.5 µl | Biologend    | 302012  |
| CD14        | APC/Cy7      | HCD14 | 2.5 µl | Biologend    | 325620  |
| CD45        | Pacific Blue | HI30  | 2.5 µl | Biologend    | 304029  |

**Supplementary Table 5. Antibody mix used to assess granulocyte populations in NSCLC patients**

| Specificity | Fluorophore  | Clone  | Volume | Manufacturer | Cat. No    |
|-------------|--------------|--------|--------|--------------|------------|
| CD45        | Pacific Blue | HI30   | 2.5 µl | Biologend    | 304029     |
| HLA DR      | BV605        | l243   | 2.5 µl | Biologend    | 307640     |
| CD19        | A700         | HIB19  | 1 µl   | Biologend    | 302226     |
| CD3         | A700         | UCHT1  | 1 µl   | Biologend    | 300424     |
| CD14        | APC/Cy7      | HCD14  | 2.5 µl | Biologend    | 325620     |
| CD15        | A488         | W6D3   | 2.5 µl | Biologend    | 323010     |
| CD11b       | BV510        | ICRF44 | 2.5 µl | Biologend    | 301334     |
| CD49d       | PE           | 9F10   | 2.5 µl | Biologend    | 304304     |
| CD117       | PE/Cy7       | 104D2  | 2.5 µl | Biologend    | 313212     |
| FcεR1a      | APC          | AER-37 | 2.5 µl | eBioscience  | 17-5899-42 |

**Supplementary Table 6. Antibody mix used to assess “Other” populations in NSCLC patients**

| Specificity | Fluorophore  | Clone         | Volume | Manufacturer | Cat. No    |
|-------------|--------------|---------------|--------|--------------|------------|
| CD45        | Pacific Blue | HI30          | 2.5 µl | Biologend    | 304029     |
| CD14        | APC/Cy7      | HCD14         | 2.5 µl | Biologend    | 325620     |
| HLA-DR      | PE/Cy7       | L243          | 2.5 µl | Biologend    | 307616     |
| CD19        | BV605        | HIB19         | 2.5 µl | Biologend    | 302244     |
| CD3         | A700         | UCHT1         | 1 µl   | Biologend    | 300424     |
| CD56        | PE           | HCD56         | 2.5 µl | Biologend    | 318305     |
| FcεR1a      | APC          | AER-37 (CRA1) | 2.5 µl | eBioscience  | 17-5899-42 |
| CD15        | A488         | W6D3          | 2.5 µl | Biologend    | 323010     |
| CD11b       | BV510        | ICRF44        | 2.5 µl | Biologend    | 301334     |

**Supplementary Table 7. Correlation between immune cell infiltrates in NSCLC tumor<sup>#</sup>**

| Correlations          |                            | CD3 <sup>+</sup> T cells | CD19 <sup>+</sup> B cells | CD56 <sup>+</sup> NK cells | CD141 <sup>+</sup> DCs | CD1c <sup>+</sup> DCs | DN DCs   | Macrophages | Eosinophils | Neutrophils | Basophils | Mast cells |        |
|-----------------------|----------------------------|--------------------------|---------------------------|----------------------------|------------------------|-----------------------|----------|-------------|-------------|-------------|-----------|------------|--------|
| Spearman's rho        | CD3 <sup>+</sup> T cells   | Correlation              | 1.000                     | -0.140                     | -0.018                 | 0.288                 | 0.034    | 0.023       | 0.148       | -0.285      | 0.297     | 0.673*     | 0.248  |
|                       |                            | P value                  | .                         | 0.361                      | 0.931                  | 0.104                 | 0.848    | 0.907       | 0.389       | 0.425       | 0.405     | 0.033      | 0.489  |
|                       |                            | N <sup>□</sup>           | 52                        | 45                         | 25                     | 33                    | 34       | 29          | 36          | 10          | 10        | 10         | 10     |
|                       | CD19 <sup>+</sup> B cells  | Correlation              |                           | 1.000                      | -0.188                 | -0.313                | -0.506** | -0.287      | -0.604**    | 0.505       | 0.056     | 0.148      | 0.492  |
|                       |                            | P value                  |                           | .                          | 0.357                  | 0.086                 | 0.003    | 0.147       | 0.000       | 0.055       | 0.844     | 0.599      | 0.063  |
|                       |                            | N                        |                           | 57                         | 26                     | 31                    | 32       | 27          | 34          | 15          | 15        | 15         | 15     |
|                       | CD56 <sup>+</sup> NK cells | Correlation              |                           |                            | 1.000                  | 0.632**               | 0.390    | 0.501*      | 0.349       | -0.046      | 0.165     | 0.666**    | -0.178 |
|                       |                            | P value                  |                           |                            | .                      | 0.002                 | 0.080    | 0.021       | 0.120       | 0.876       | 0.573     | 0.009      | 0.543  |
|                       |                            | N                        |                           |                            | 30                     | 21                    | 21       | 21          | 21          | 14          | 14        | 14         | 14     |
|                       | CD141 <sup>+</sup> DCs     | Correlation              |                           |                            |                        | 1.000                 | 0.344    | 0.277       | 0.094       | -0.455      | 0.245     | 0.329      | -0.308 |
|                       |                            | P value                  |                           |                            |                        | .                     | 0.050    | 0.132       | 0.593       | 0.138       | 0.443     | 0.297      | 0.331  |
|                       |                            | N                        |                           |                            |                        | 35                    | 33       | 31          | 35          | 12          | 12        | 12         | 12     |
| CD1c <sup>+</sup> DCs | Correlation                |                          |                           |                            |                        | 1.000                 | 0.486**  | 0.368*      | 0.042       | -0.046      | 0.214     | -0.014     |        |
|                       | P value                    |                          |                           |                            |                        | .                     | 0.006    | 0.027       | 0.897       | 0.888       | 0.504     | 0.965      |        |
|                       | N                          |                          |                           |                            |                        | 36                    | 31       | 36          | 12          | 12          | 12        | 12         |        |
| DN DCs                | Correlation                |                          |                           |                            |                        |                       | 1.000    | 0.307       | -0.210      | 0.186       | 0.515     | 0.249      |        |
|                       | P value                    |                          |                           |                            |                        |                       | .        | 0.093       | 0.512       | 0.564       | 0.087     | 0.436      |        |
|                       | N                          |                          |                           |                            |                        |                       | 31       | 31          | 12          | 12          | 12        | 12         |        |
| Macrophages           | Correlation                |                          |                           |                            |                        |                       |          | 1.000       | -0.084      | -0.252      | 0.049     | -0.357     |        |
|                       | P value                    |                          |                           |                            |                        |                       |          | .           | 0.795       | 0.430       | 0.880     | 0.255      |        |
|                       | N                          |                          |                           |                            |                        |                       |          | 38          | 12          | 12          | 12        | 12         |        |
| Eosinophils           | Correlation                |                          |                           |                            |                        |                       |          |             | 1.000       | 0.560*      | -0.149    | 0.562*     |        |
|                       | P value                    |                          |                           |                            |                        |                       |          |             | .           | 0.016       | 0.554     | 0.015      |        |
|                       | N                          |                          |                           |                            |                        |                       |          |             | 18          | 18          | 18        | 18         |        |
| Neutrophils           | Correlation                |                          |                           |                            |                        |                       |          |             |             | 1.000       | 0.314     | 0.520*     |        |
|                       | P value                    |                          |                           |                            |                        |                       |          |             |             | .           | 0.205     | 0.027      |        |
|                       | N                          |                          |                           |                            |                        |                       |          |             |             | 18          | 18        | 18         |        |
| Basophils             | Correlation                |                          |                           |                            |                        |                       |          |             |             |             | 1.000     | 0.253      |        |
|                       | P value                    |                          |                           |                            |                        |                       |          |             |             |             | .         | 0.311      |        |
|                       | N                          |                          |                           |                            |                        |                       |          |             |             |             | 18        | 18         |        |
| Mast cells            | Correlation                |                          |                           |                            |                        |                       |          |             |             |             |           | 1.000      |        |
|                       | P value                    |                          |                           |                            |                        |                       |          |             |             |             |           | .          |        |
|                       | N                          |                          |                           |                            |                        |                       |          |             |             |             |           | 18         |        |

<sup>#</sup> Spearman's rho in IBM SPSS version 25 was used to assess the strength of association between types of immune cells in NSCLC tumor. Value of 1 or -1 represents perfect correlation, whereas 0 indicates no association. Correlations that were considered significant are highlighted in yellow. Percentages of immune cells calculated from the live leukocyte population were used in the analysis.

<sup>□</sup> N=Number of NSCLC patients. All analyzed NSCLC patient tumors were included in the analysis.

\* p<0.05 level (2-tailed)

\*\* p<0.01 level (2-tailed)

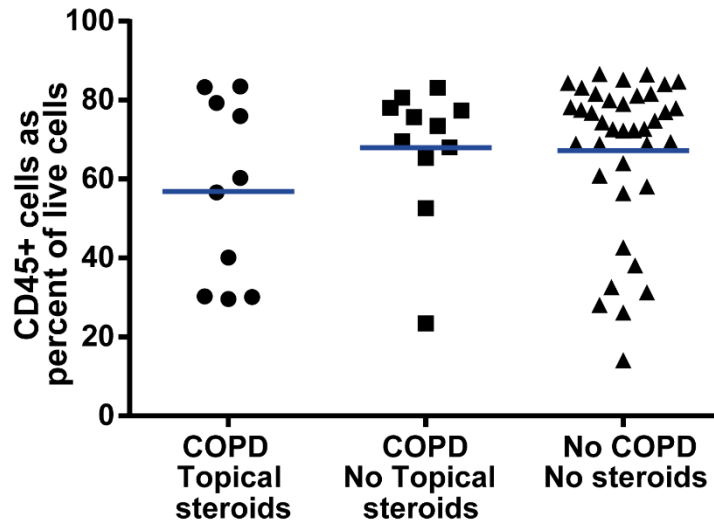

**Supplementary Figure 1. No influence of steroid use and chronic obstructive pulmonary disease (COPD) on immune cell infiltration in NSCLC.** The figure shows CD45<sup>+</sup> leukocyte infiltration in tumor tissue from NSCLC patients with COPD who used topical steroids, NSCLC patients with COPD who did not use topical steroids, and NSCLC patients who did not exhibit COPD and did not use steroids. Leukocytes (CD45<sup>+</sup> cells) are presented in percent of all live (PI<sup>-</sup>) cells. Each symbol represents data from one patient. Blue lines indicate mean values, and differences between group means were tested using Kruskal-Wallis test with Dunn's post-test. No significant p values were observed.

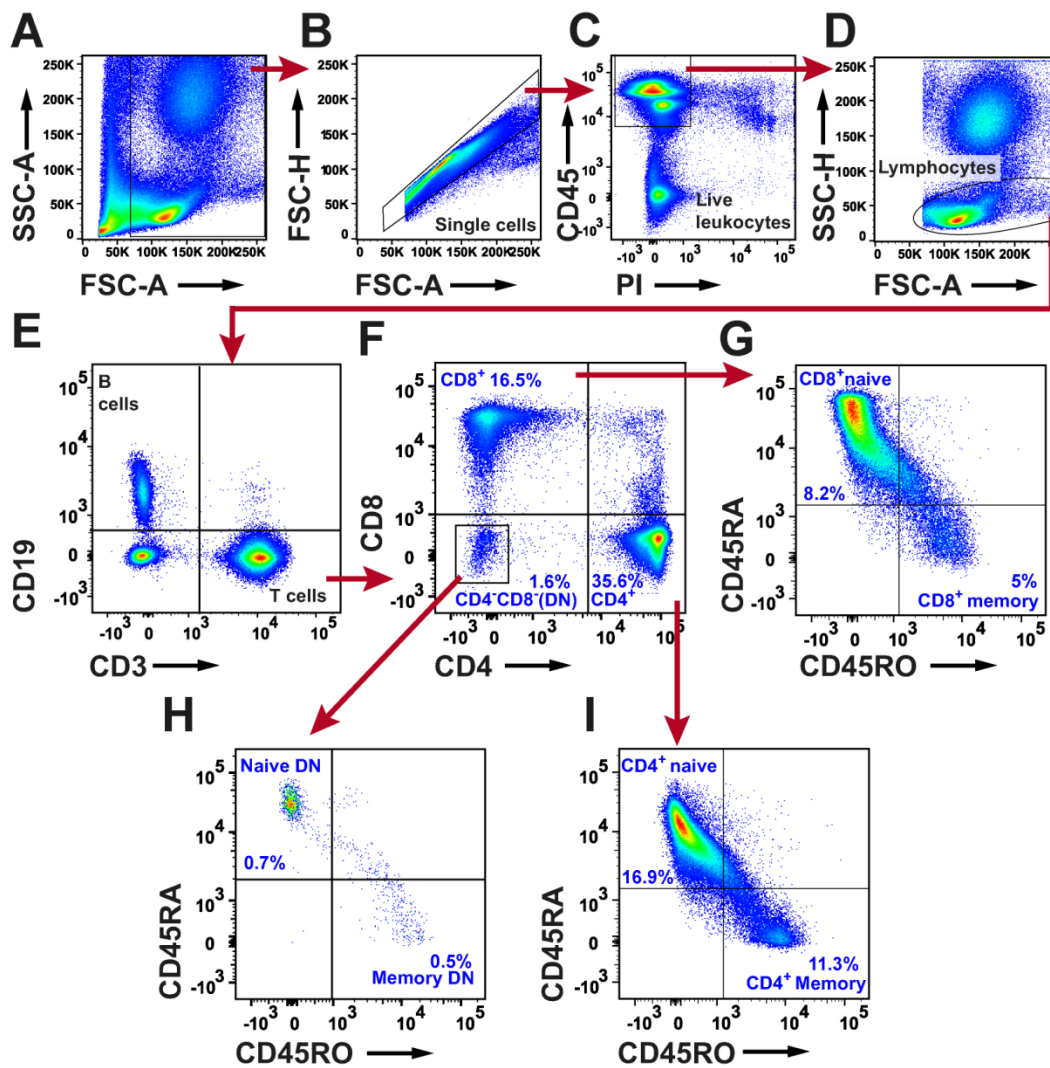

**Supplementary Figure 2. Flow cytometry analysis of T cells in PBMCs from NSCLC patients.** (A) The FSC-A versus SSC-A plot was used to gate nucleated cells. (B) Single cells were gated in an FSC-A versus FSC-H plot. (C) Live leukocytes were defined as CD45<sup>+</sup>PI<sup>-</sup> cells. (D) The lymphocyte gate. (E) T cells are defined as CD19<sup>-</sup>CD3<sup>+</sup> cells which were divided in (F) CD4<sup>+</sup> population, CD8<sup>+</sup> population, and CD4<sup>-</sup>CD8<sup>-</sup> population. Each subset was examined for CD45RA<sup>+</sup>CD45RO<sup>-</sup> naive phenotype and CD45RA<sup>-</sup>CD45RO<sup>+</sup> memory phenotype. (G) Naive/memory phenotyping of CD8<sup>+</sup> T cells. (H) Naive/memory phenotyping of CD4<sup>-</sup>CD8<sup>-</sup> T cells. (I) Naive/memory phenotyping of CD4<sup>+</sup> T cells. The numbers indicated for all populations represent mean percent calculated from the total number of live leukocytes for 26 NSCLC patients (adenocarcinoma n=15, and squamous cell carcinoma n=11). DN, CD4<sup>-</sup>CD8<sup>-</sup> double negative T cells.

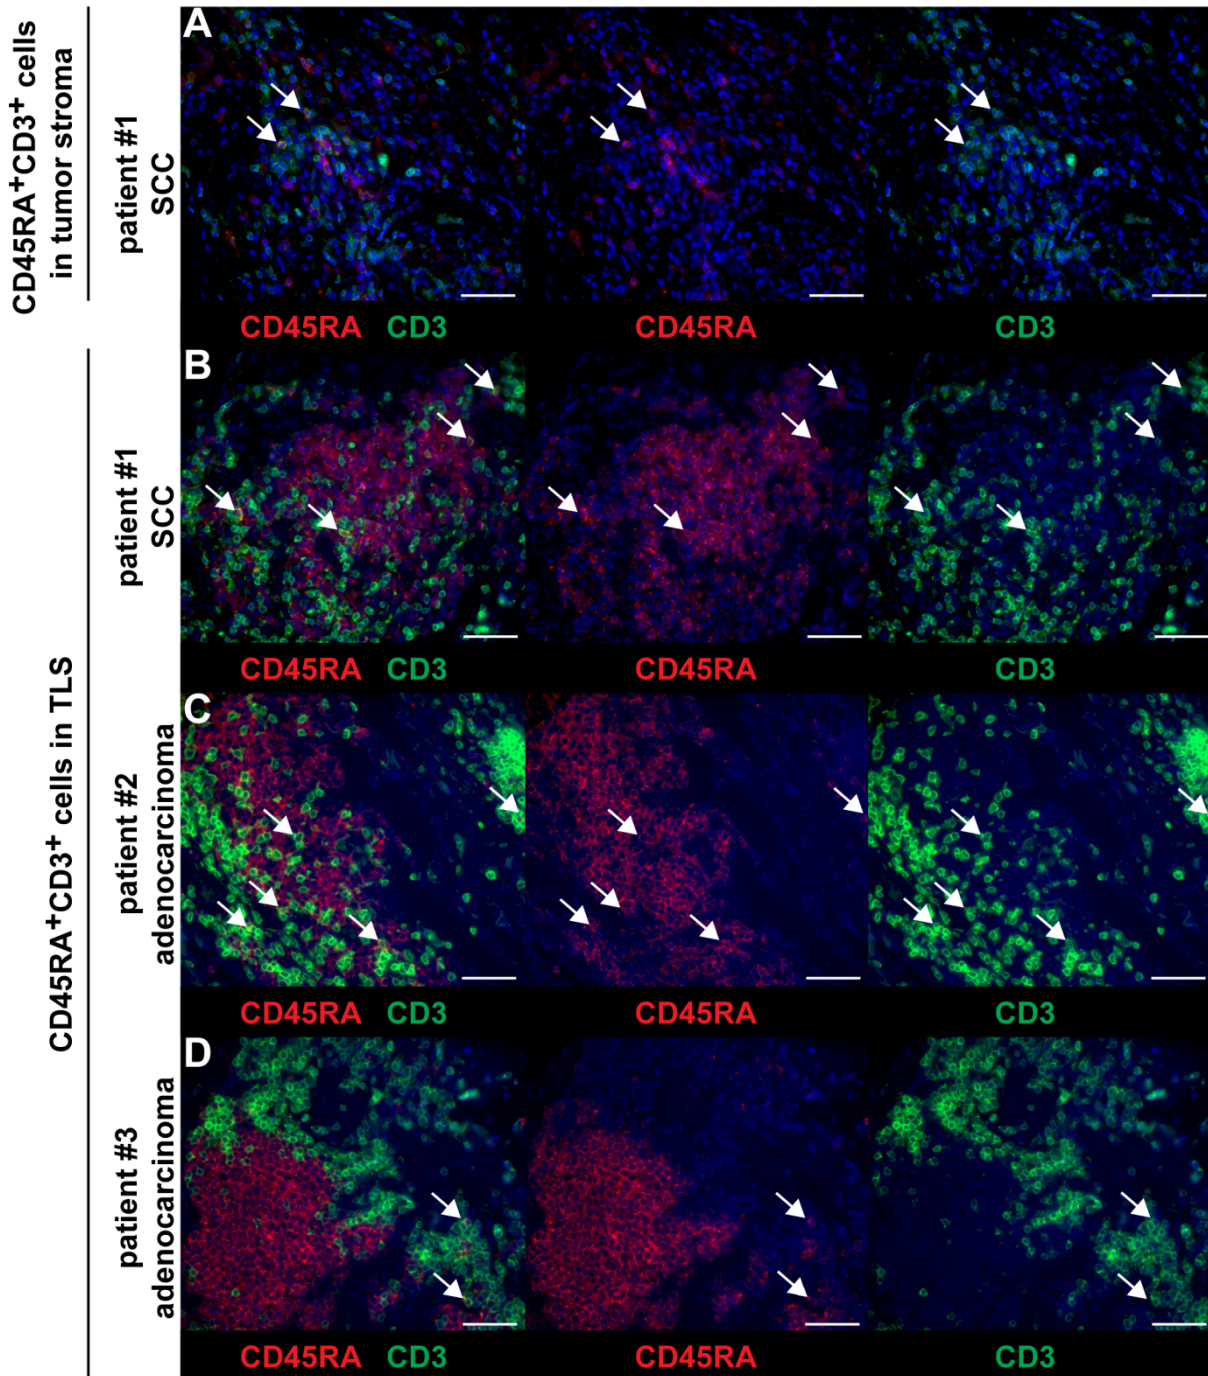

**Supplementary Figure 3. Immunofluorescent staining of CD45RA<sup>+</sup>CD3<sup>+</sup> cells in NSCLC tumor tissue.**

(A-D) Representative images of paraffin-embedded sections from tumor tissue of 1 patient with lung squamous cell carcinoma and 2 patients with lung adenocarcinoma stained with anti-CD3 monoclonal antibody clone 2GV6 (green) and anti-CD45RA monoclonal antibody clone 158-4D3 (red). The sections were incubated with a mixture of the anti-CD45RA and anti-CD3 antibodies overnight at 4 °C, followed by incubation with a mixture of Alexa Fluor 488-labeled goat anti-rabbit IgG and Alexa Fluor 555-labeled goat anti-mouse IgG2a for 2 h at room temperature. Some double positive CD3<sup>+</sup>CD45RA<sup>+</sup> T cells (white arrows) were observed both in (A) tumor stroma and (B-D) tertiary lymphoid structures (TLS). Double positive CD3<sup>+</sup>CD45RA<sup>+</sup> T cells in tumor stroma are presumably T<sub>EMRA</sub> cells, whereas CD3<sup>+</sup>CD45RA<sup>+</sup> T cells in TLS more likely represent naive T cells. Similar results were observed in tissue from all the investigated NSCLC patients (n=5). Histological subtypes for each patient are indicated. SCC, squamous cell carcinoma. TLS, tertiary lymphoid structures. Original magnification, 400x. Scale bars, 100 μm.

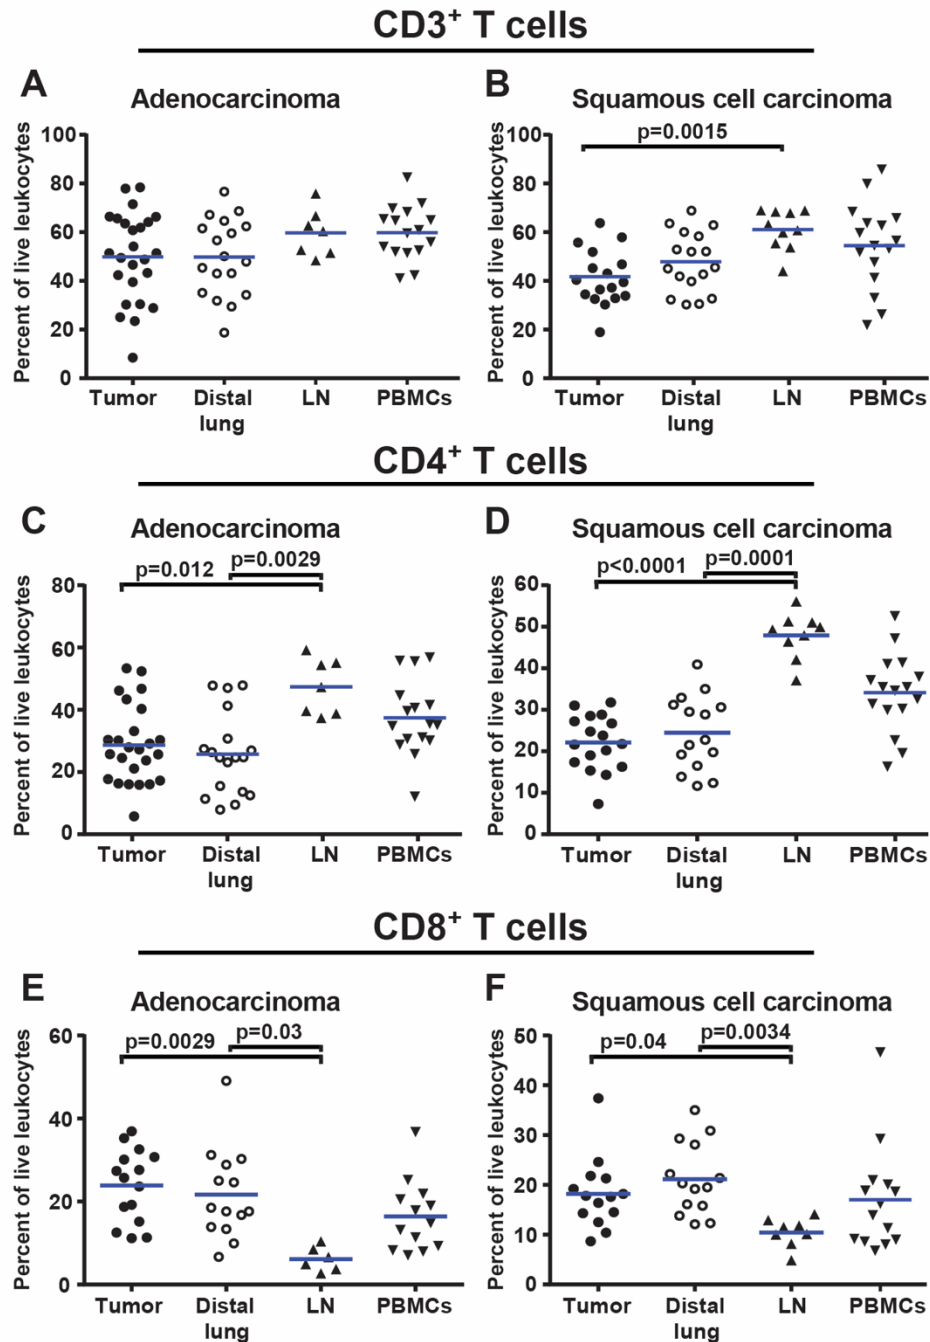

**Supplementary Figure 4. Percentages of T cells in different tissues from NSCLC patients. (A,B)** Comparison of CD3<sup>+</sup> T cell percentages in tissues from different anatomical locations of patients diagnosed with (A) adenocarcinoma and (B) squamous cell carcinoma. (C,D) Percentages of CD4<sup>+</sup> T cells in different tissues from patients with (C) adenocarcinoma and (D) squamous cell carcinoma. (E,F) Comparison of CD8<sup>+</sup> T cell percentages in (E) adenocarcinoma and (F) squamous cell carcinoma. The percentages were calculated from the total number of live leukocytes (CD45<sup>+</sup>PI<sup>-</sup>), and each symbol represents data from one patient. Blue lines indicate mean values. Kruskal-Wallis test and Dunn's post-test were used to detect differences between tumor, distal lung, and lymph node (LN).



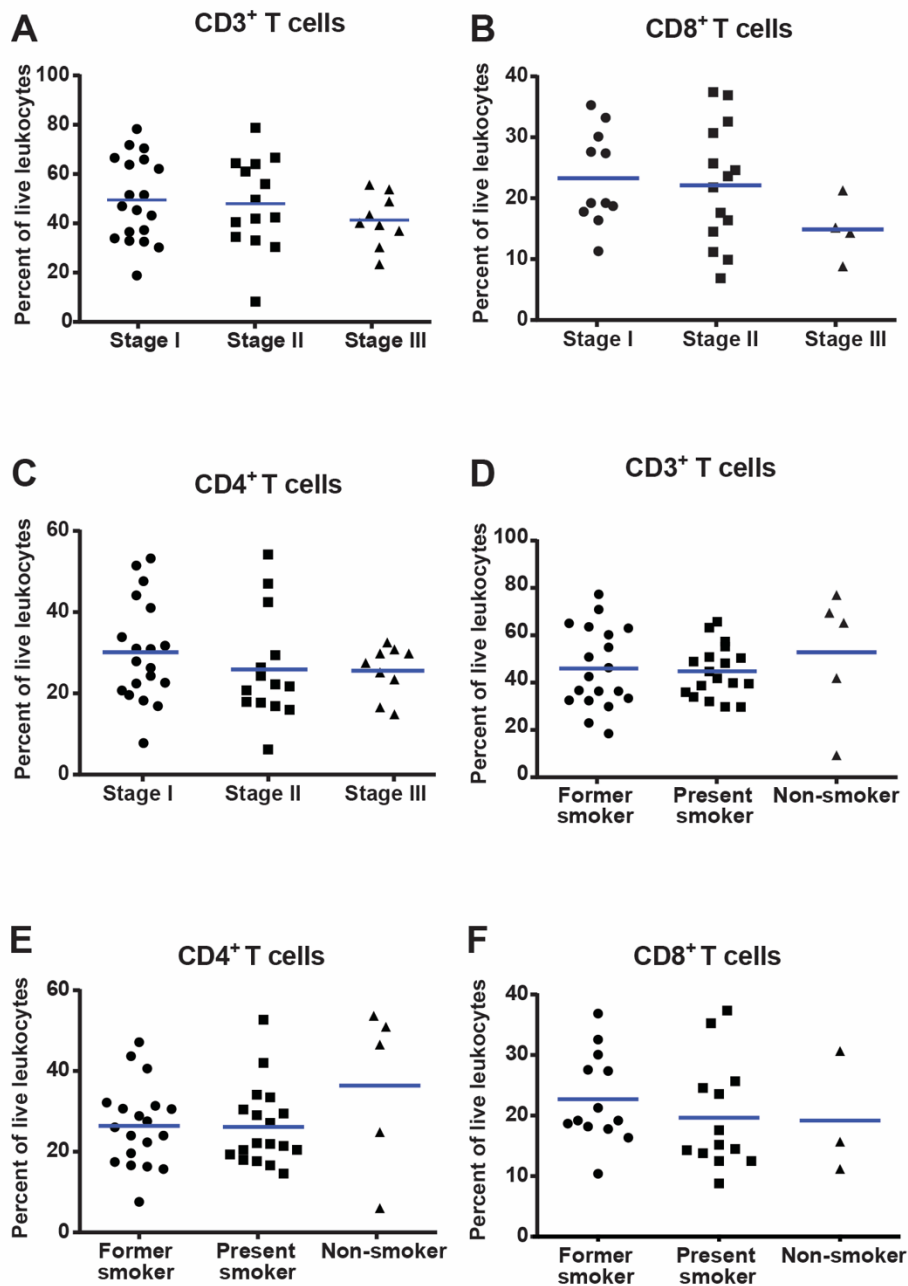

**Supplementary Figure 5. Percentages of T cells in different stages of NSCLC and in patients with different smoking histories.** (A-C) T cells as percentage of live leukocytes (CD45<sup>+</sup>PI<sup>-</sup>) in NSCLC tumor stages I, II and III: (A) CD3<sup>+</sup> T cells, (B) CD8<sup>+</sup> T cells, and (C) CD4<sup>+</sup> T cells. (D-F) T cells as percentage of live leukocytes (CD45<sup>+</sup>PI<sup>-</sup>) in tumor from NSCLC patients with different smoking histories: (D) CD3<sup>+</sup> T cells, (E) CD4<sup>+</sup> T cells, and (F) CD8<sup>+</sup> T cells. The group former smoker includes patients who stopped smoking at the latest 6 months before surgery; present smoker smoked at the time of surgery or at least 6 months prior to surgery; and non-smoker never smoked. Each symbol represents data from one patient, and blue lines indicate mean values. The gating strategy is shown in Figure 2. Kruskal-Wallis test and Dunn's post-test were used to detect differences between group means. No significant p values were obtained.

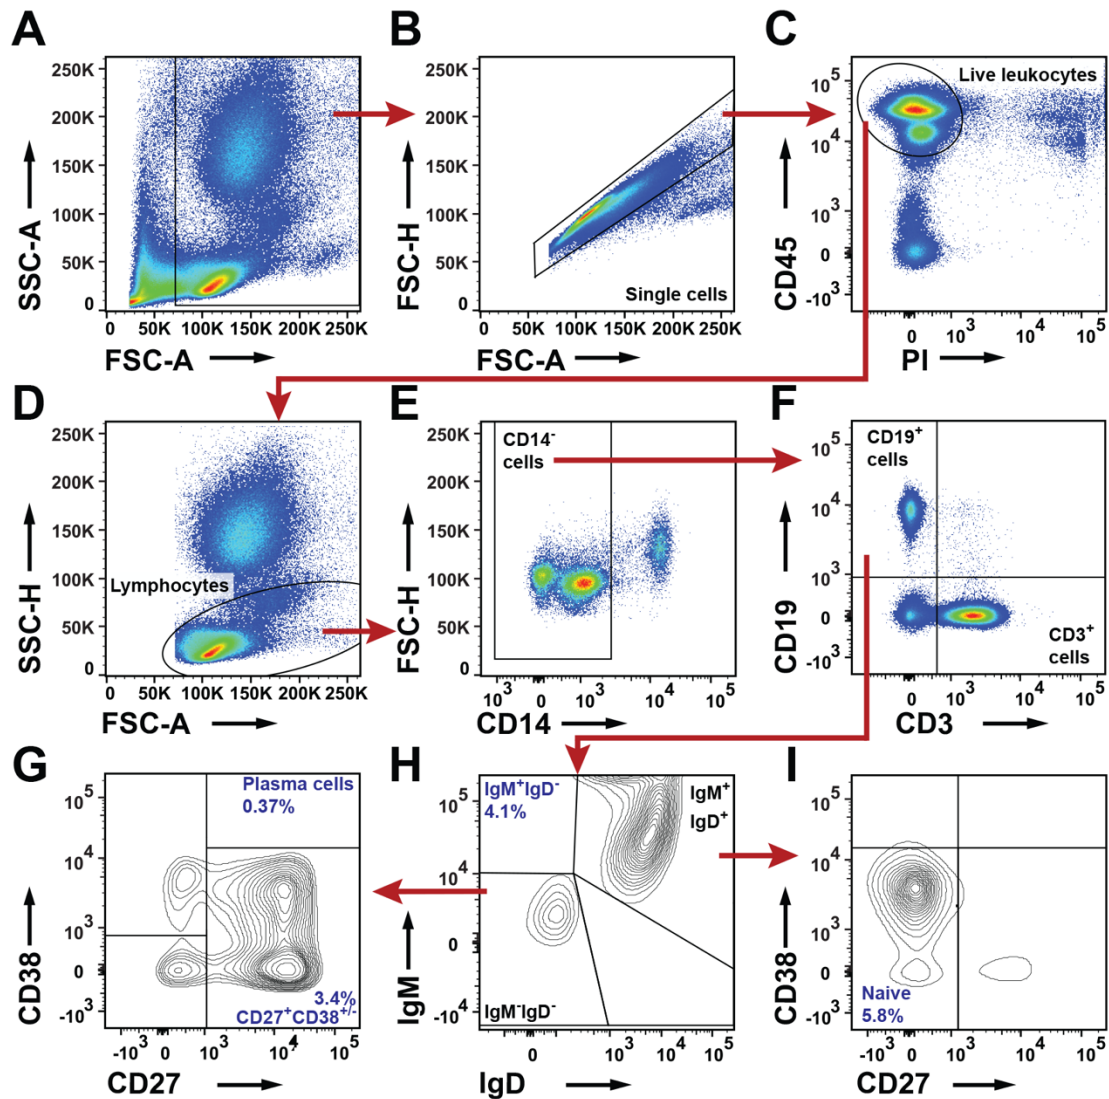

**Supplementary Figure 6. Flow cytometry analysis of B cell sub-populations in PBMCs from NSCLC patients.** (A) FSC-A and SSC-A were used to exclude debris and gate nucleated cells. (B) The FSC-A versus FSC-H plot was used to gate single cells and exclude doublets. (C) Live leukocytes were defined as CD45<sup>+</sup>PI<sup>-</sup>. (D) The lymphocyte gate in FSC and SSC plot. (E) Gate excluding CD14<sup>+</sup> monocytes. (F) The B cell gate defining all B cells as CD19<sup>+</sup> and CD3<sup>-</sup>. (G-I) Characterization of B cell sub-populations. (G) IgM<sup>-</sup>IgD<sup>-</sup> B cells could be divided into CD27<sup>+</sup>CD38<sup>+/-</sup> B cells and CD27<sup>+</sup>CD38<sup>++</sup> plasma cells. (H) CD19<sup>+</sup>CD3<sup>-</sup> were separated into three populations based on IgM and IgD expression. (I) Naive B cells are defined as CD27<sup>-</sup>CD38<sup>+/-</sup>. Percentages shown in the figure are calculated from the total number of live leukocytes and represent mean values for PBMCs of 25 NSCLC patients (adenocarcinoma n=15, and squamous cell carcinoma n=10).

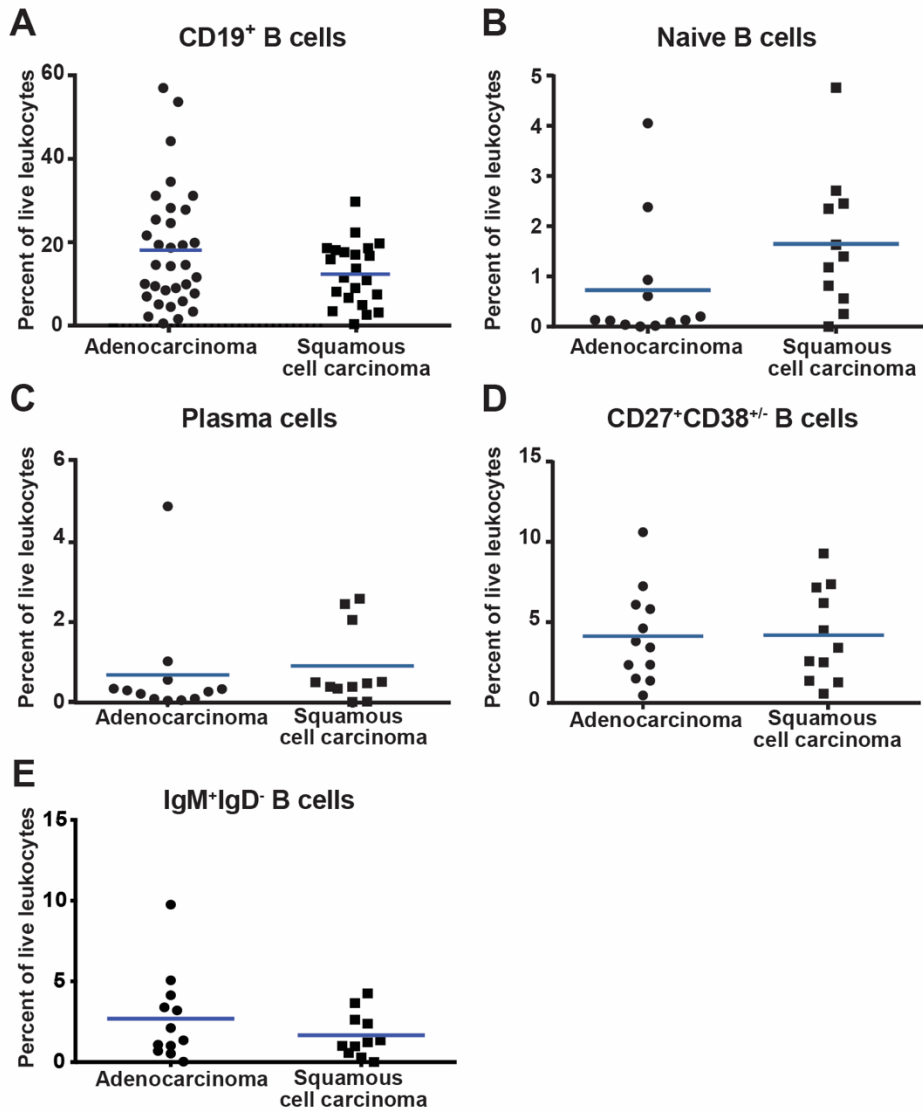

**Supplementary Figure 7. Percentages of B cells in adenocarcinoma and squamous cell carcinoma. (A-E)** Percentages of CD19<sup>+</sup> B cells and B cell sub-populations in NSCLC tumor tissue of adenocarcinoma and squamous cell carcinoma. **(A)** Percentages of CD19<sup>+</sup> B cells, **(B)** naive B cells, **(C)** plasma cells, **(D)** CD27<sup>+</sup>CD38<sup>+/-</sup> B cells, and **(E)** IgM<sup>+</sup>IgD<sup>-</sup> B cells. The percentages are calculated from the population of live leukocytes (CD45<sup>+</sup>PI<sup>-</sup>), and the gating strategy is shown in Figure 4. Each symbol represents data from one patient, and blue lines indicate mean values. Kruskal-Wallis test and Dunn's post-test were used to detect differences between groups. No significant p values were obtained.

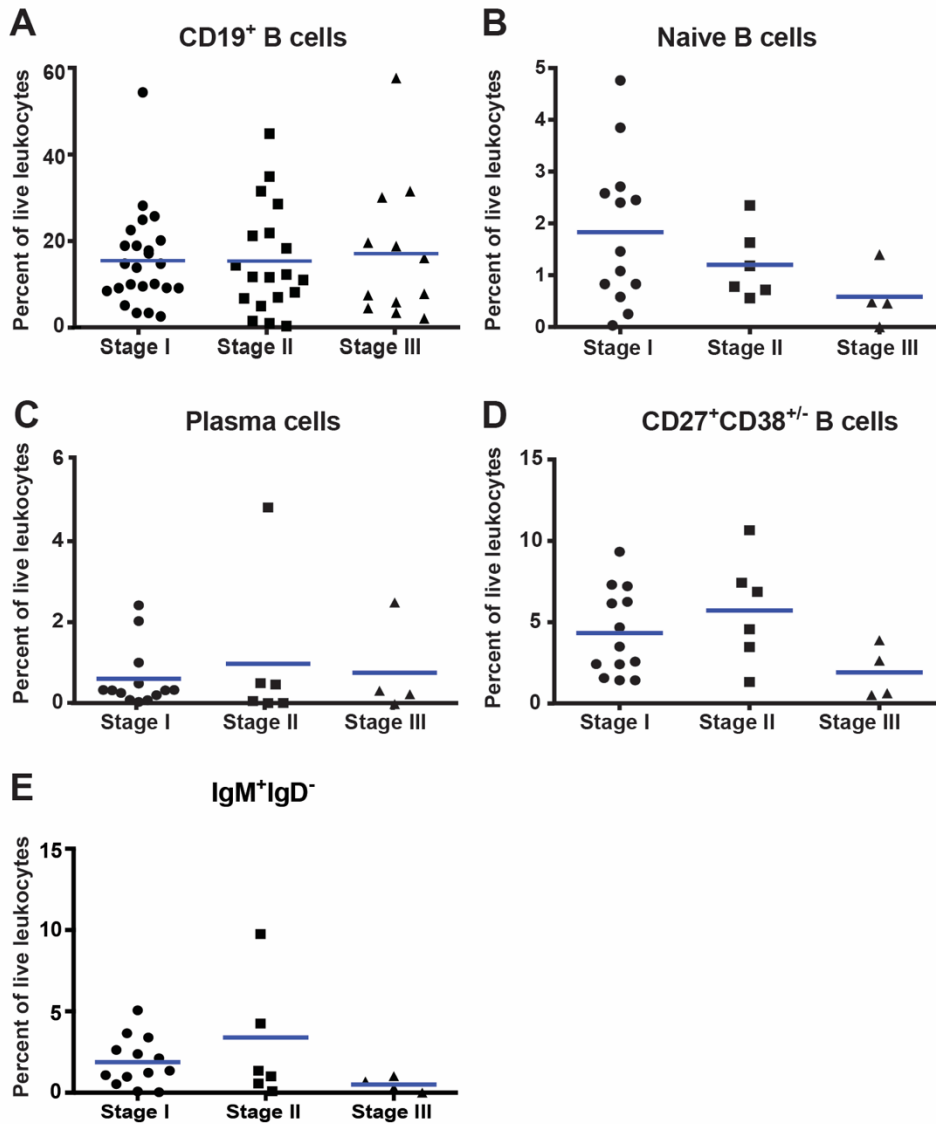

**Supplementary Figure 8. Percentages of B cells in different stages of NSCLC.** (A-E) Comparison of percentages of CD19<sup>+</sup> B cells and sub-populations in tumor tissue of NSCLC in stage I, II or III. (A) Percentages of CD19<sup>+</sup> B cells, (B) naive B cells, (C) plasma cells, (D) CD27<sup>+</sup>CD38<sup>+/-</sup> B cells, and (E) IgM<sup>+</sup>IgD<sup>-</sup> B cells. The percentages are calculated from the total number of live leukocytes (CD45<sup>+</sup>PI<sup>+</sup>), and the gating strategy is shown in Figure 4. Each symbol represents data from one patient. Blue lines indicate mean values, and Kruskal-Wallis test and Dunn's post-test were used to detect differences between group means. No significant p values were obtained.

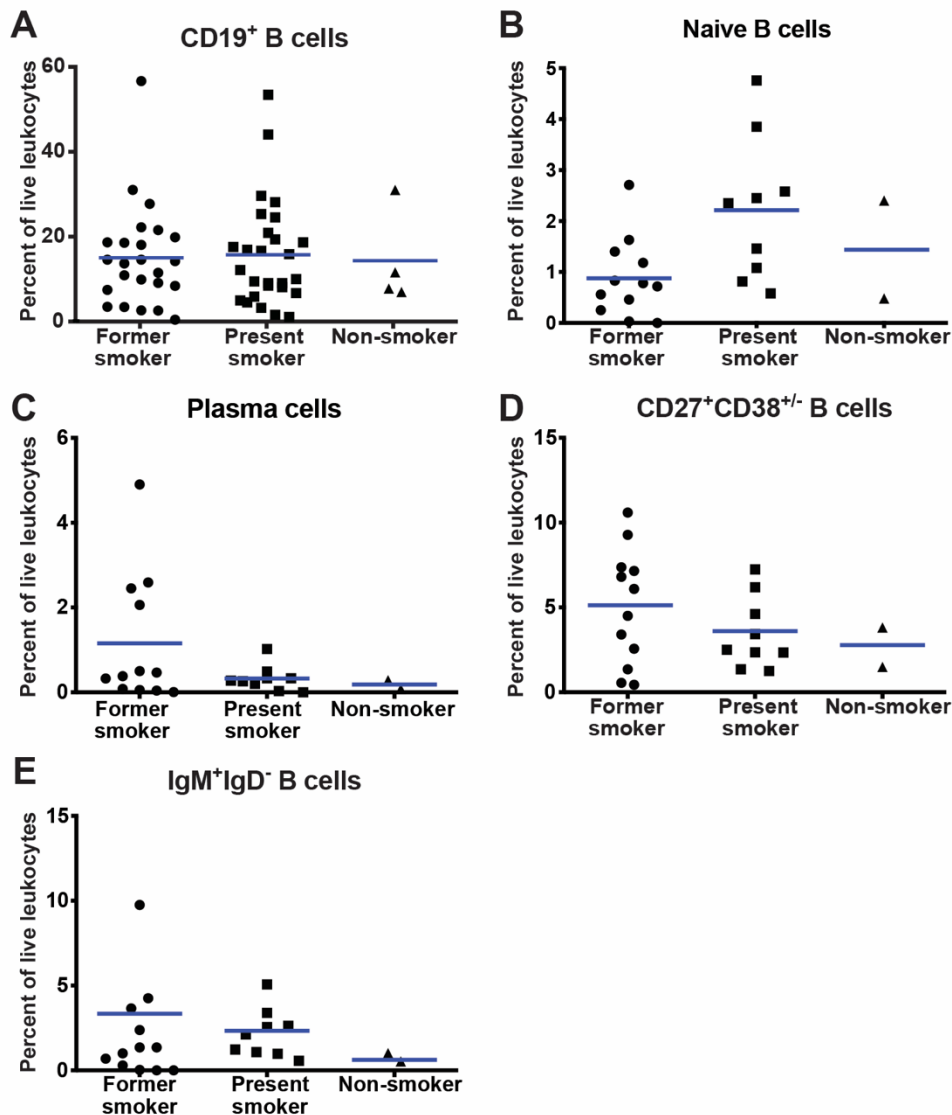

**Supplementary Figure 9. Percentages of B cells in NSCLC patients with different smoking histories.** (A-E) NSCLC patients were divided into 3 groups based on their smoking histories: former smoker (stopped smoking at the latest 6 months before surgery), present smoker (smoked at the time of surgery or at least 6 months prior to surgery), and non-smoker (never smoked). The proportion of B cells in tumor tissue is given as percentage of live leukocytes (CD45<sup>+</sup>PI<sup>-</sup>) and is shown for (A) CD19<sup>+</sup> B cells, (B) naive B cells, (C) plasma cells, (D) CD27<sup>+</sup>CD38<sup>+/-</sup> B cells, and (E) IgM<sup>+</sup>IgD<sup>-</sup> B cells. The cells were gated as indicated in Figure 4. Each symbol represents data from one patient, and blue lines indicate mean values. Kruskal-Wallis test and Dunn's post-test were used to detect differences between the groups. No significant p values were obtained.

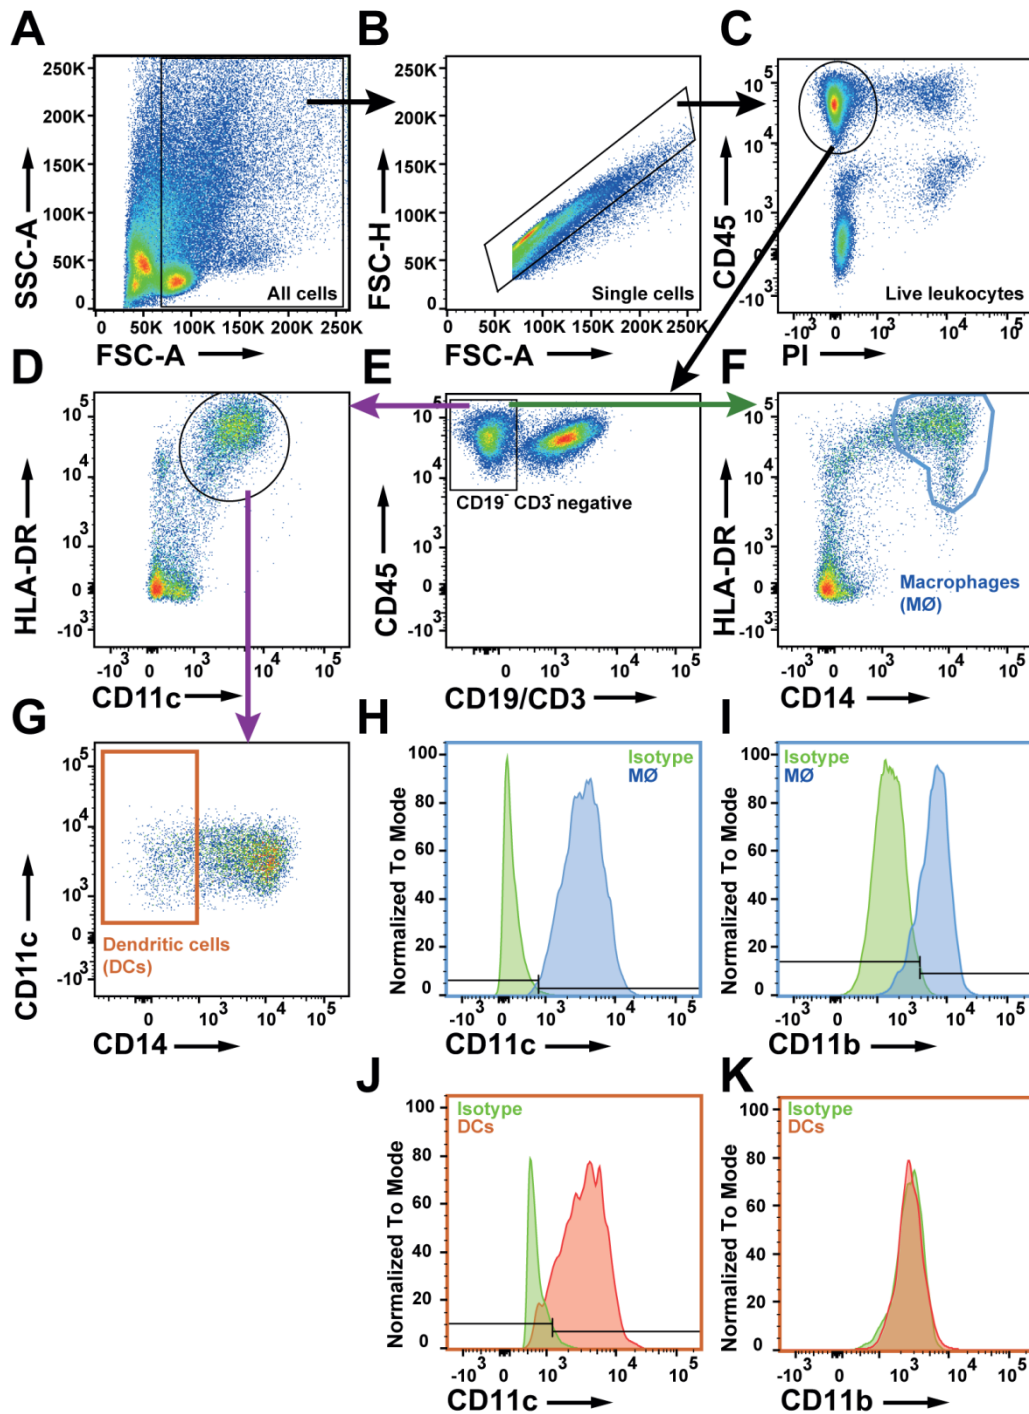

**Supplementary Figure 10. Expression of CD11b and CD11c on macrophages and DCs in NSCLC tumor.** The figure shows CD11b and CD11c expression in a tumor sample from one patient diagnosed with adenocarcinoma. (A) FSC-A and SSC-A were used to gate nucleated cells. (B) An FSC-A versus FSC-H plot was used to gate single cells and exclude doublets. (C) Live leukocytes were defined as CD45<sup>+</sup>PI<sup>-</sup>. (D) Cells double positive for CD11c and HLA-DR were gated among CD19<sup>-</sup>CD3<sup>-</sup> live leukocytes. (E) The plot shows exclusion of CD3<sup>+</sup> and CD19<sup>+</sup> cells. (F) Macrophages were defined as CD14<sup>+</sup>HLA-DR<sup>+</sup> and gated among CD19<sup>-</sup>CD3<sup>-</sup> live leukocytes. (G) Myeloid DCs defined as CD14<sup>-</sup>CD11c<sup>+</sup>. (H) Expression of CD11c by the macrophage population (MØ) gated in panel F. (I) Expression of CD11b by the macrophage population (MØ) gated in panel F. (J) CD11c expression on the DCs gated in panel G. (K) Expression of CD11b by the DCs gated in panel G. Isotype-matched control antibody stainings are shown in green in the panels H-K.

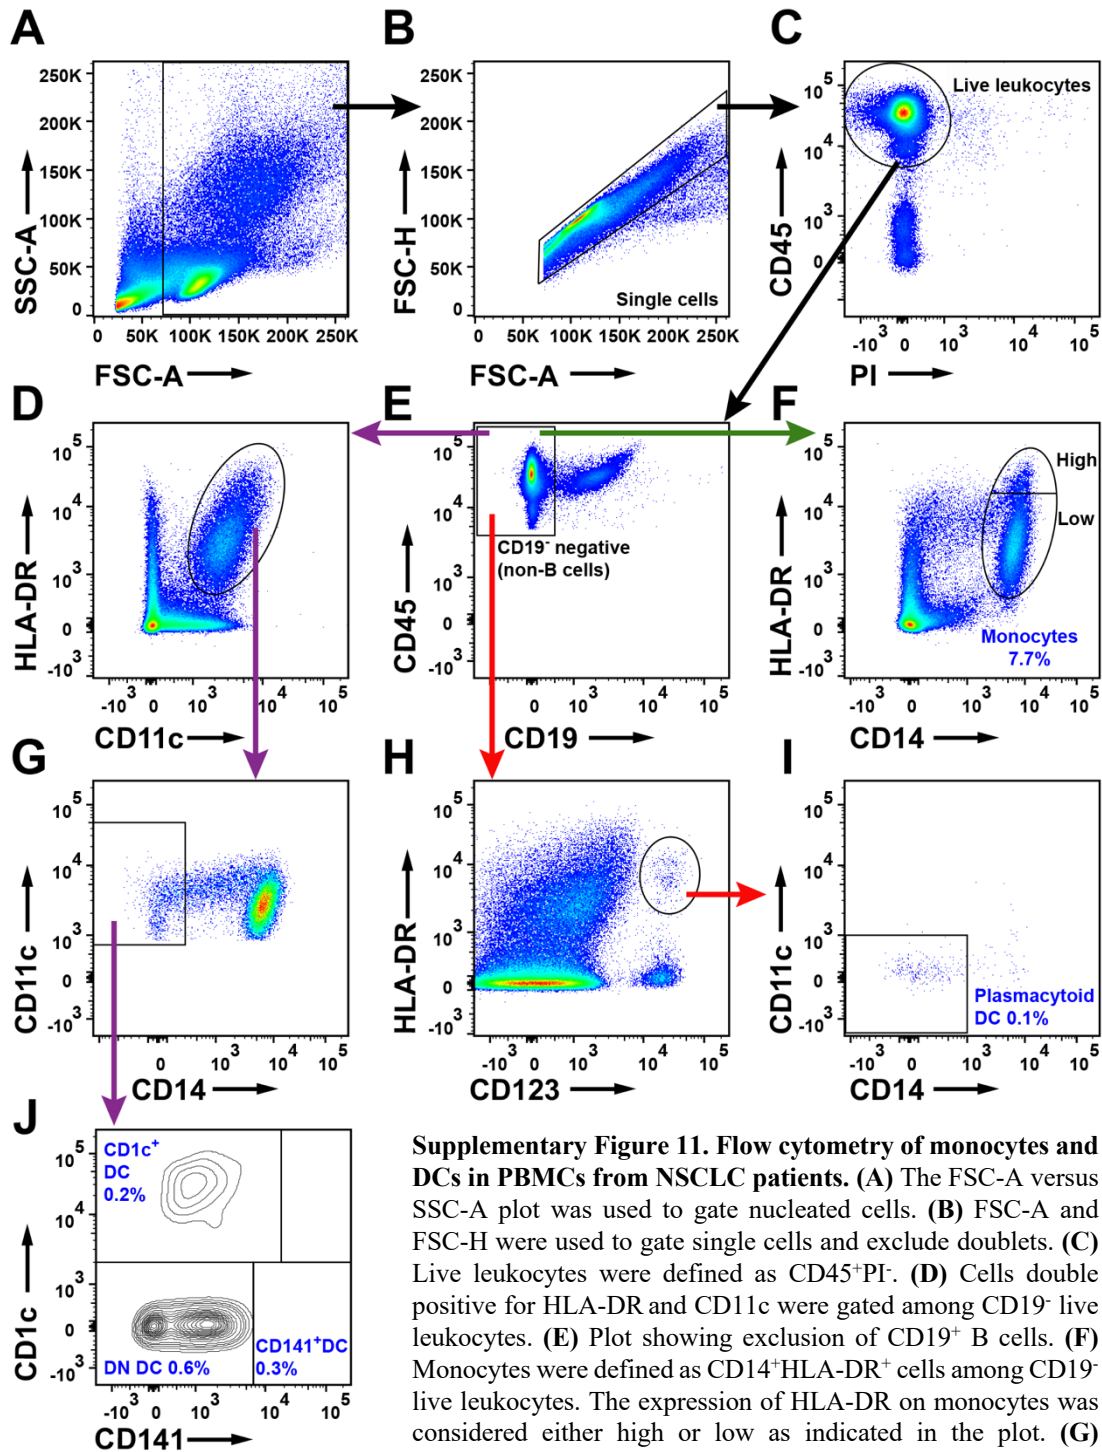

**Supplementary Figure 11. Flow cytometry of monocytes and DCs in PBMCs from NSCLC patients.** (A) The FSC-A versus SSC-A plot was used to gate nucleated cells. (B) FSC-A and FSC-H were used to gate single cells and exclude doublets. (C) Live leukocytes were defined as CD45<sup>+</sup>PI<sup>-</sup>. (D) Cells double positive for HLA-DR and CD11c were gated among CD19<sup>-</sup> live leukocytes. (E) Plot showing exclusion of CD19<sup>+</sup> B cells. (F) Monocytes were defined as CD14<sup>+</sup>HLA-DR<sup>+</sup> cells among CD19<sup>-</sup> live leukocytes. The expression of HLA-DR on monocytes was considered either high or low as indicated in the plot. (G) Myeloid DCs were defined as CD14<sup>+</sup>CD11c<sup>+</sup>. (H) Plasmacytoid DCs are CD123<sup>+</sup>HLA-DR<sup>+</sup> and also (I) CD14<sup>+</sup> and CD11c<sup>+</sup>. (J) Two subsets of myeloid DCs were identified: CD141<sup>+</sup> DCs, and CD1c<sup>+</sup> DCs in addition to a population of double negative (DN) cells. The percentages of the cell populations shown in the figure were calculated from the total number of live leukocytes and represent mean values from data of 26 patients (14 adenocarcinoma, 11 squamous cell carcinoma, and 1 large cell carcinoma).

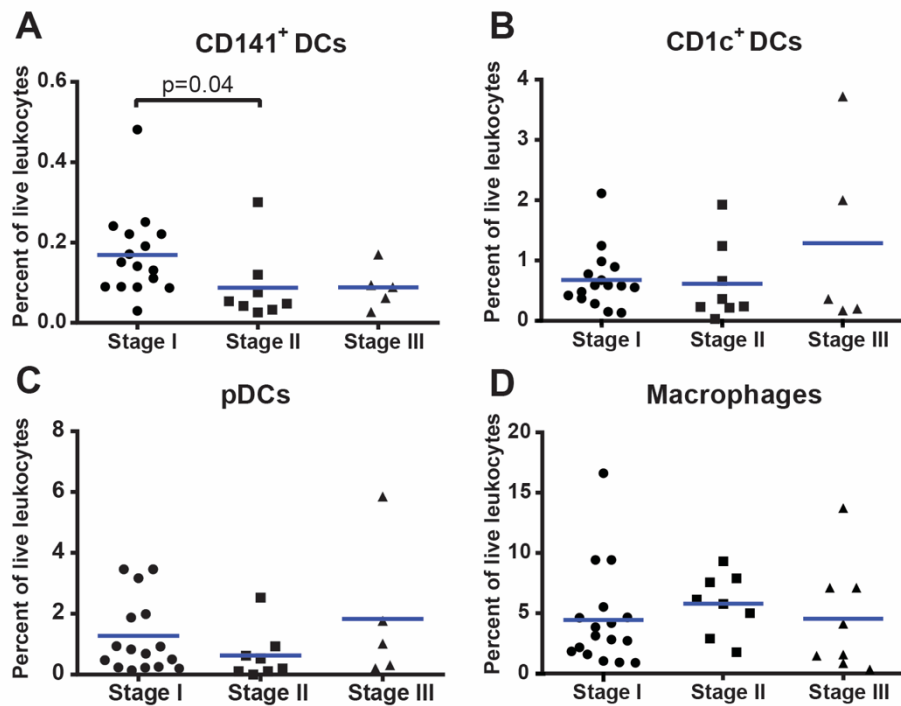

**Supplementary Figure 12. Percentages of DC subsets and macrophages in different stages of NSCLC.** (A-D) DC subsets and macrophages in tumor tissue are shown as percentage of live leukocytes (CD45<sup>+</sup>PI<sup>+</sup>) in stages I, II, and III of NSCLC: (A) CD141<sup>+</sup> DCs, (B) CD1c<sup>+</sup> DCs, (C) plasmacytoid DCs (pDCs), and (D) macrophages. The cells were gated as indicated in Figure 6. Each symbol represents data from one patient, and blue lines indicate mean values. Kruskal-Wallis test and Dunn's post-test were used to detect differences between stages of NSCLC.



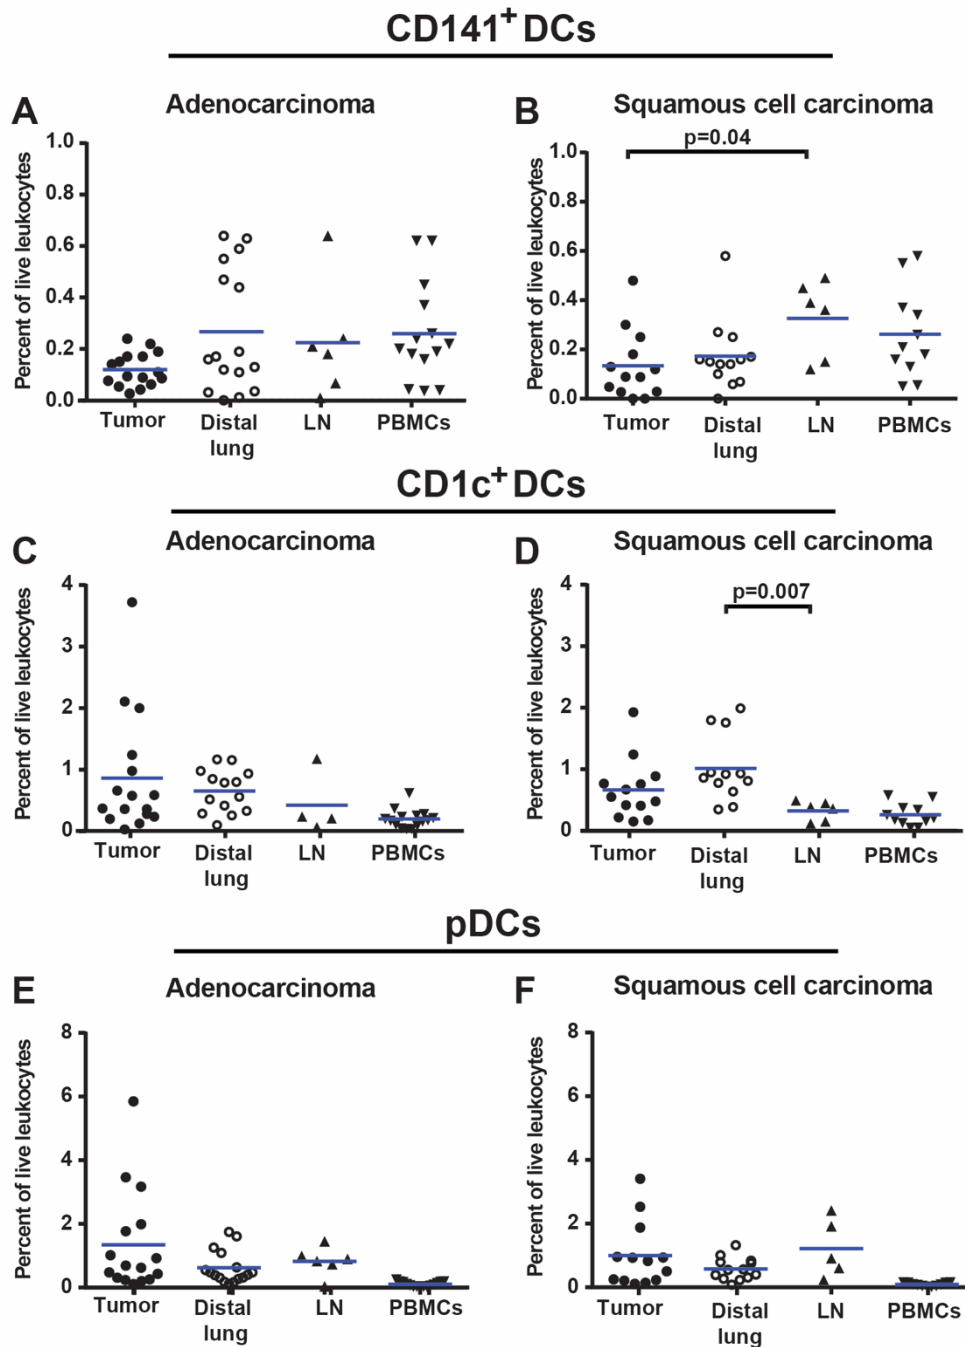

**Supplementary Figure 13. Percentages of DC subsets in NSCLC adenocarcinoma and squamous cell carcinoma.** (A) Percentages of CD141<sup>+</sup> DCs in adenocarcinoma patients. (B) Percentages of CD141<sup>+</sup> DCs in squamous cell carcinoma patients. (C) CD1c<sup>+</sup> DCs in adenocarcinoma, and (D) squamous cell carcinoma. (E) Plasmacytoid DCs (pDCs) in adenocarcinoma, and (F) squamous cell carcinoma. The percentages were calculated from the total number of live leukocytes (CD45<sup>+</sup>PI<sup>-</sup>), and each symbol represents data from one individual. Mean values are indicated by blue lines. The non-parametric Kruskal-Wallis test and Dunn's post-test were used to detect differences between tumor, distal lung, and lymph node (LN).

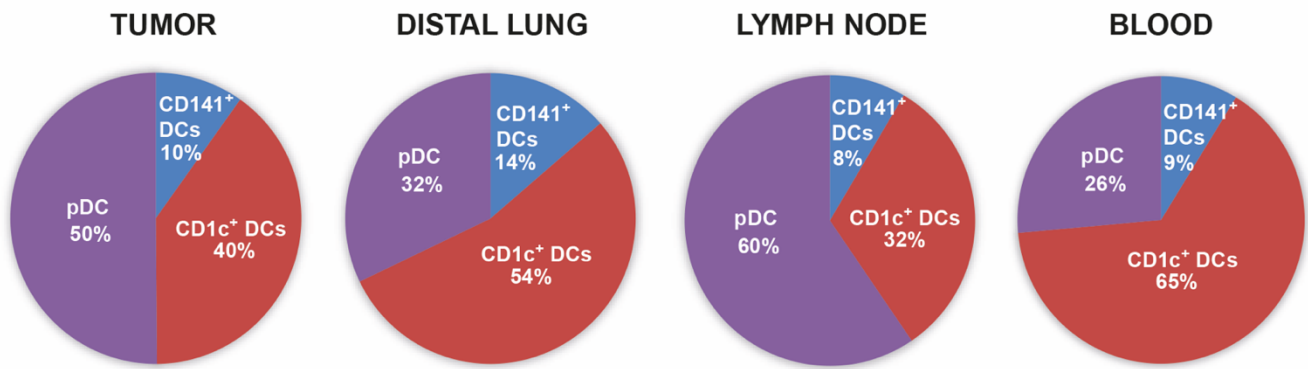

**Supplementary Figure 14. Proportions of different DC populations in NSCLC.** The DC subsets CD141<sup>+</sup>, CD1c<sup>+</sup>, and plasmacytoid DCs (pDCs) are presented as percentage of the whole DC population. Tumor tissue, distal lung (non-cancerous lung), lymph node, and blood from 29 NSCLC patients were analyzed (16 adenocarcinoma, and 13 squamous cell carcinoma). The gating strategy is shown in Figure 6, Supplementary Figure 11 and 22. Data of the individual patients included in the pie chart are shown in Supplementary Figure 15.

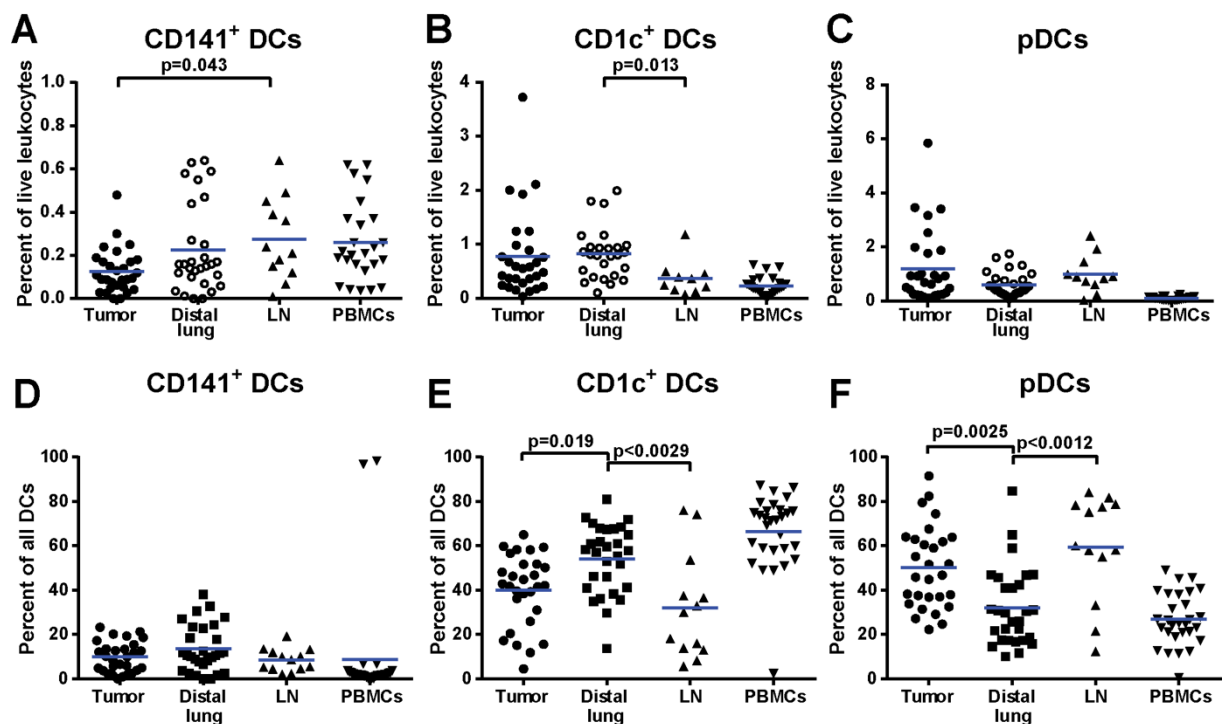

**Supplementary Figure 15. Percentages of DC subsets in different tissues from NSCLC patients.**

(A-F) DC subsets were analyzed in tumor tissue, distal lung (non-cancerous lung), lymph node (LN), and PBMCs of 29 NSCLC patients (16 adenocarcinoma, and 13 squamous cell carcinoma). Subsets of DCs: (A,D) CD141<sup>+</sup> DCs, (B,E) CD1c<sup>+</sup> DCs, and (C,F) plasmacytoid DCs (pDCs) were identified by the gating strategies shown in Figure 6, Supplementary Figure 11 and 22. (A-C) The percentages of the DC subsets were calculated from the live leukocyte population (CD45<sup>+</sup>PI<sup>-</sup>). (D-F) The percentages for all three DC subsets per sample (CD141<sup>+</sup>, CD1c<sup>+</sup>, and pDC) calculated for panels A-C were summarized and set to 100% in order to present the proportion of each subset from the whole DC population. Each symbol in the graphs represents data from one patient, and mean values are indicated by blue lines. The non-parametric Kruskal-Wallis test and Dunn's post-test were used to detect differences between tumor, distal lung, and lymph node (LN). The results in D-F are also presented in pie charts in Supplementary Figure 14.

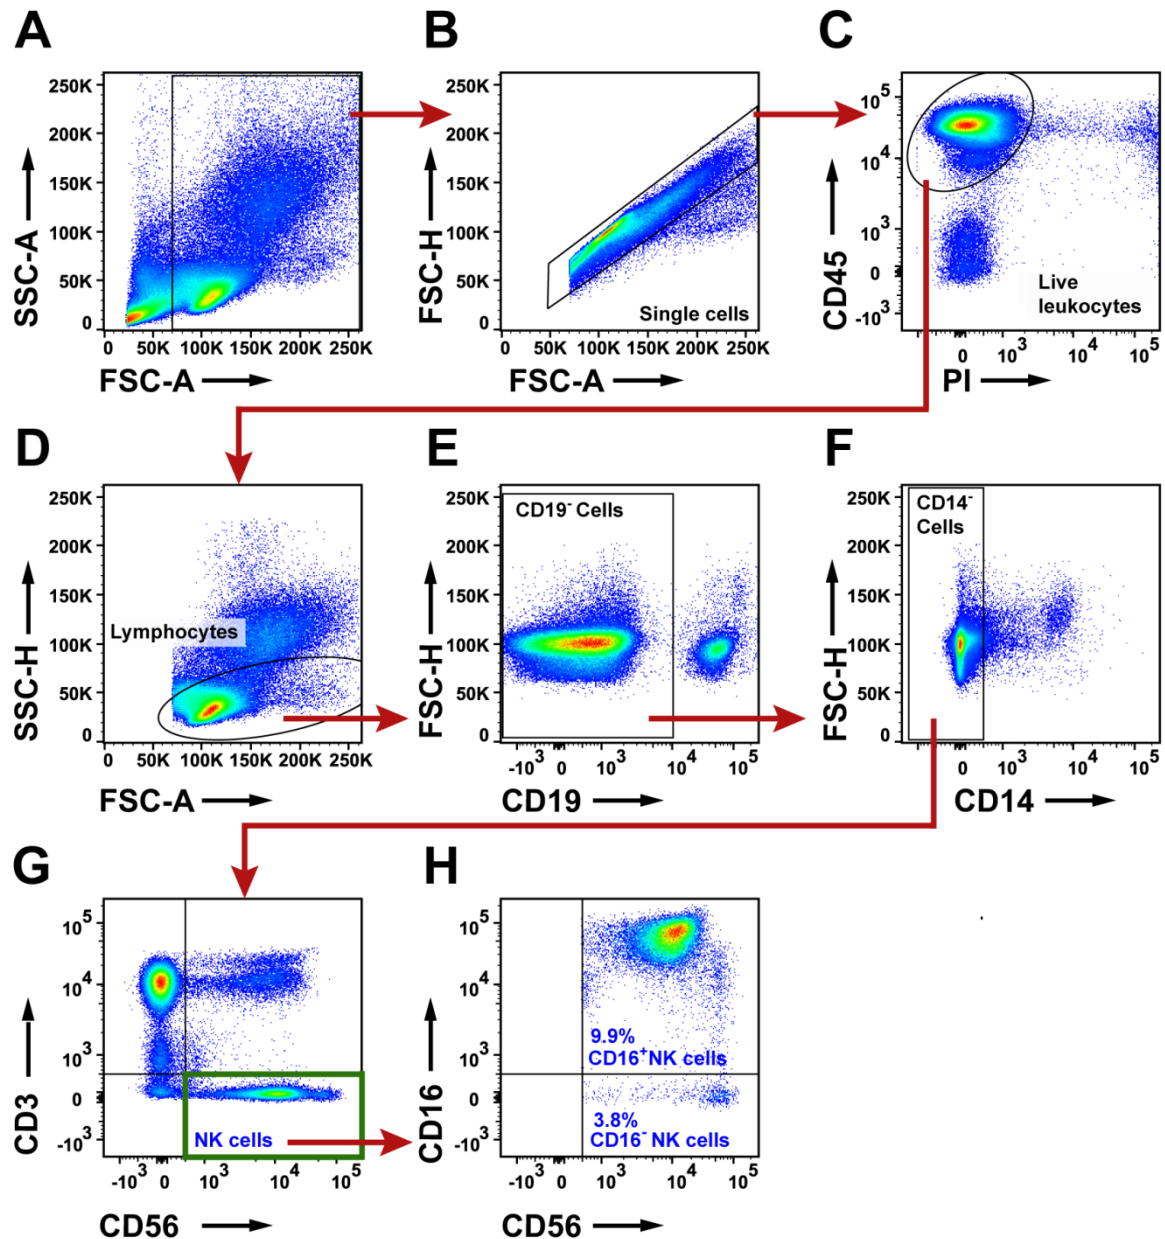

**Supplementary Figure 16. Flow cytometry analysis of NK cells in PBMCs from NSCLC patients.** (A) FSC-A and SSC-A were used to gate nucleated cells. (B) FSC-A and FSC-H were used to exclude doublets and gate single cells. (C) Live leukocytes are defined as CD45<sup>+</sup>PI<sup>-</sup> cells. (D) The lymphocyte gate. (E) CD19<sup>+</sup> B cells were excluded and (F) CD14<sup>+</sup> cells were excluded from the population of live leukocytes. (G) NK cells are defined as CD3<sup>+</sup>CD56<sup>+</sup>. (H) Two NK cell subsets were identified: CD16<sup>+</sup> and CD16<sup>-</sup> NK cells. The percentages shown in the figure were calculated from the population of live leukocytes, and represent mean values from data of 17 NSCLC patients (10 adenocarcinoma, 7 squamous cell carcinoma).

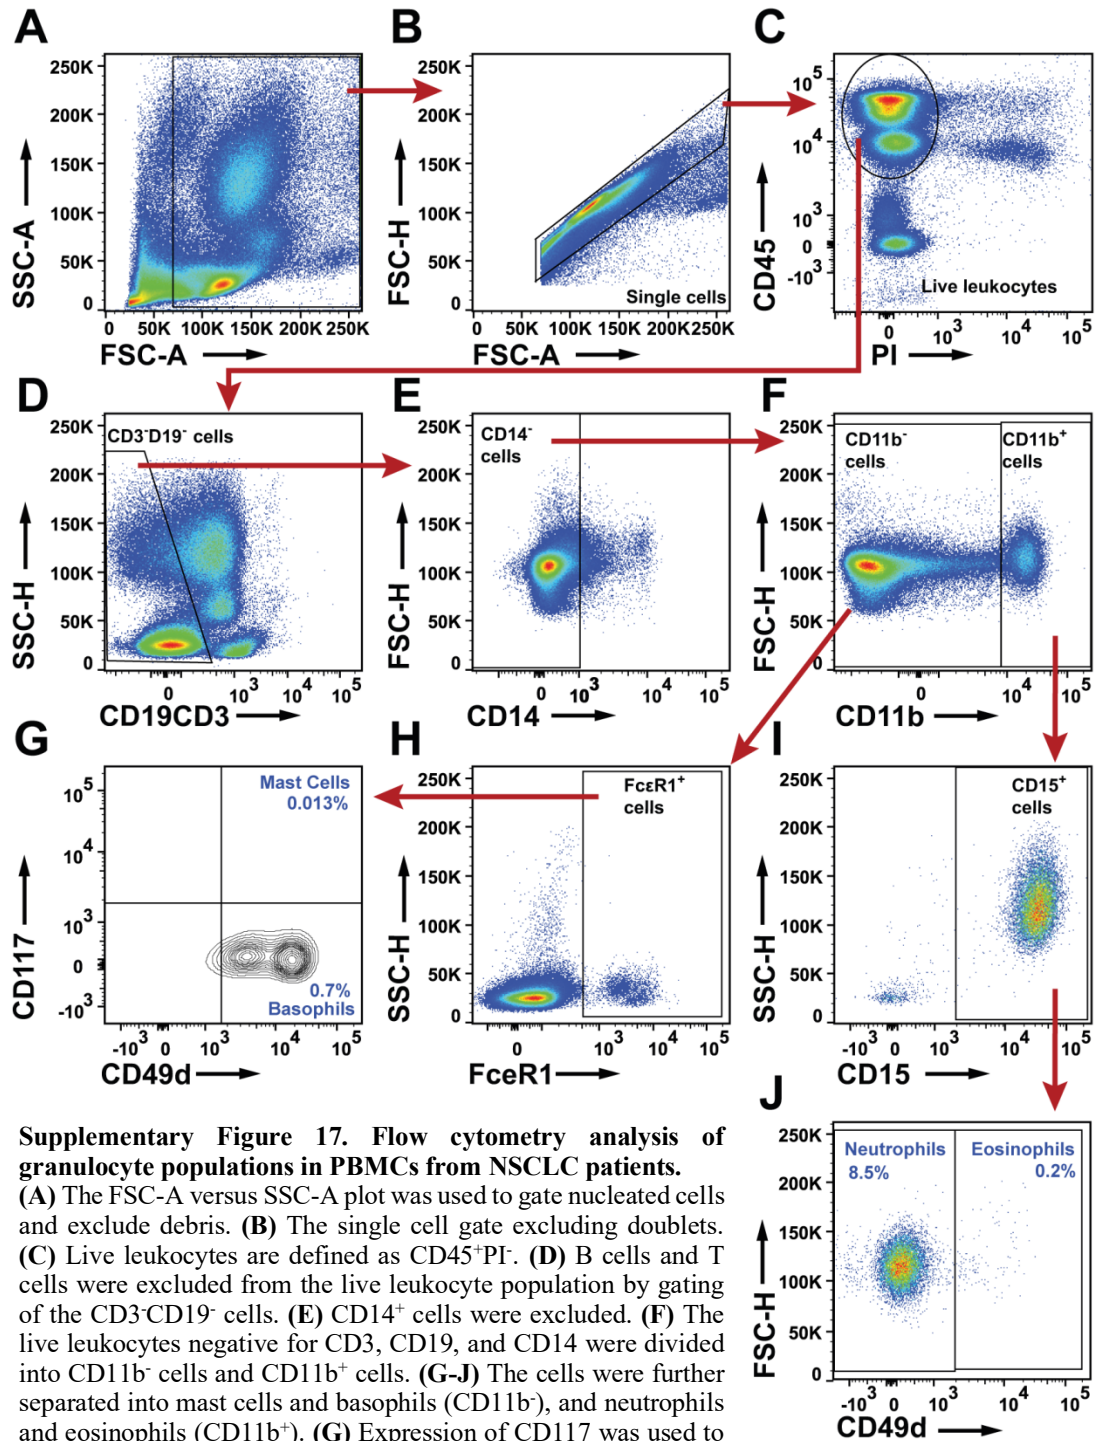

**Supplementary Figure 17. Flow cytometry analysis of granulocyte populations in PBMCs from NSCLC patients.**

(A) The FSC-A versus SSC-A plot was used to gate nucleated cells and exclude debris. (B) The single cell gate excluding doublets. (C) Live leukocytes are defined as CD45<sup>+</sup>PI<sup>-</sup>. (D) B cells and T cells were excluded from the live leukocyte population by gating of the CD3<sup>+</sup>CD19<sup>-</sup> cells. (E) CD14<sup>+</sup> cells were excluded. (F) The live leukocytes negative for CD3, CD19, and CD14 were divided into CD11b<sup>-</sup> cells and CD11b<sup>+</sup> cells. (G-J) The cells were further separated into mast cells and basophils (CD11b<sup>-</sup>), and neutrophils and eosinophils (CD11b<sup>+</sup>). (G) Expression of CD117 was used to divide the CD11b<sup>+</sup>FcεR1<sup>+</sup>CD49d<sup>+</sup> population into mast cells (CD117<sup>+</sup>) and basophils (CD117<sup>-</sup>). (H) The plot shows gating of FcεR1<sup>+</sup> cells. (I) In the CD11b<sup>+</sup> leukocyte population, neutrophils and eosinophils are defined as CD15<sup>+</sup>. (J) Neutrophils are further defined as CD49d<sup>-</sup> and eosinophils are defined as CD49d<sup>+</sup>. The percentage of each granulocyte population was calculated from the total number of live leukocytes, and the indicated percentages are mean values of data from 16 NSCLC patients (9 adenocarcinoma and 7 squamous cell carcinoma).

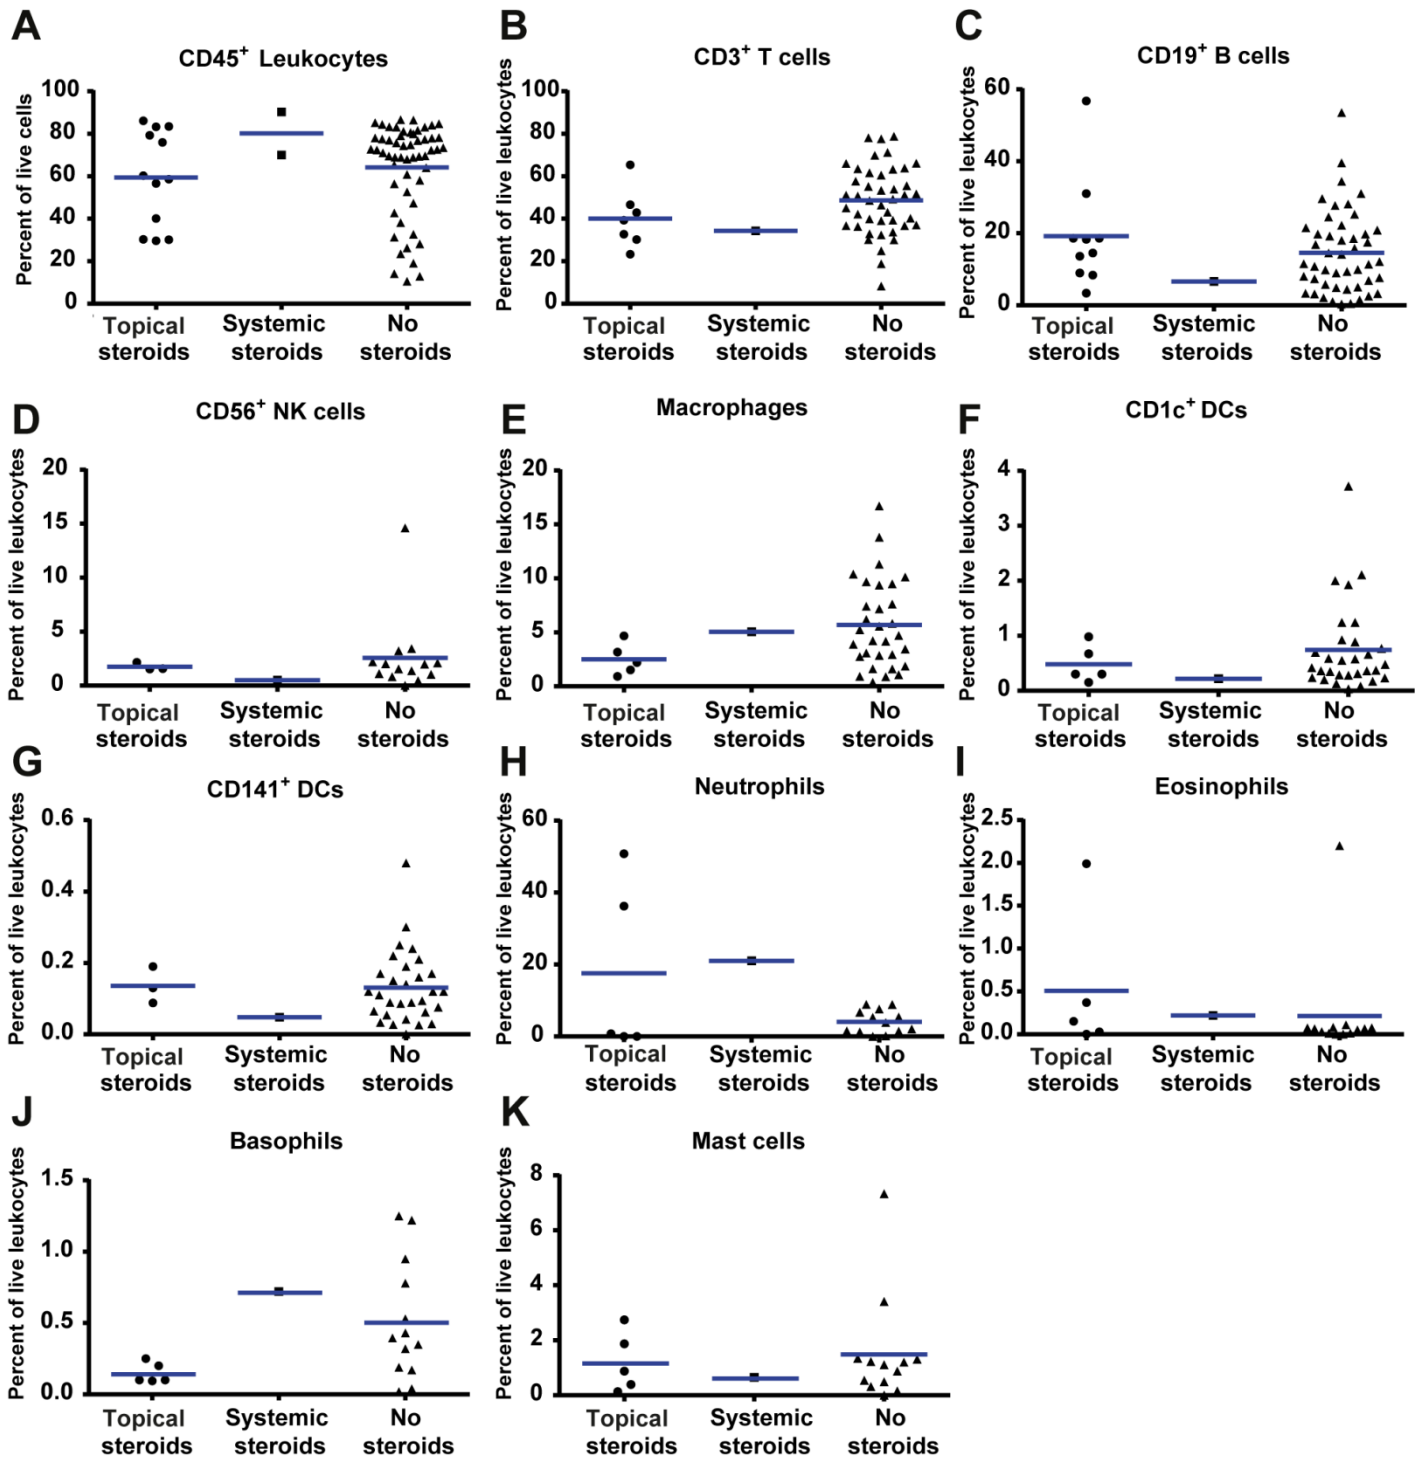

**Supplementary Figure 18. Immune cell infiltrates in NSCLC tumor from patients grouped based on steroid treatment.** Immune cell infiltrates were analyzed in tumors from patients treated with topical steroids, patients treated with systemic steroids, and patients who did not use steroids. (A) Occurrence of CD45<sup>+</sup> leukocytes in NSCLC tumor as percentage of all live cells. (B-K) Occurrence in NSCLC tumor of the indicated immune cells shown as percentage of the live leukocyte population. Each symbol represents data from one patient, and blue lines indicate mean values. Differences between group means were tested using Kruskal-Wallis test with Dunn's post-test (panel A) or Mann-Whitney test (panels B-K). No significant p values were observed.

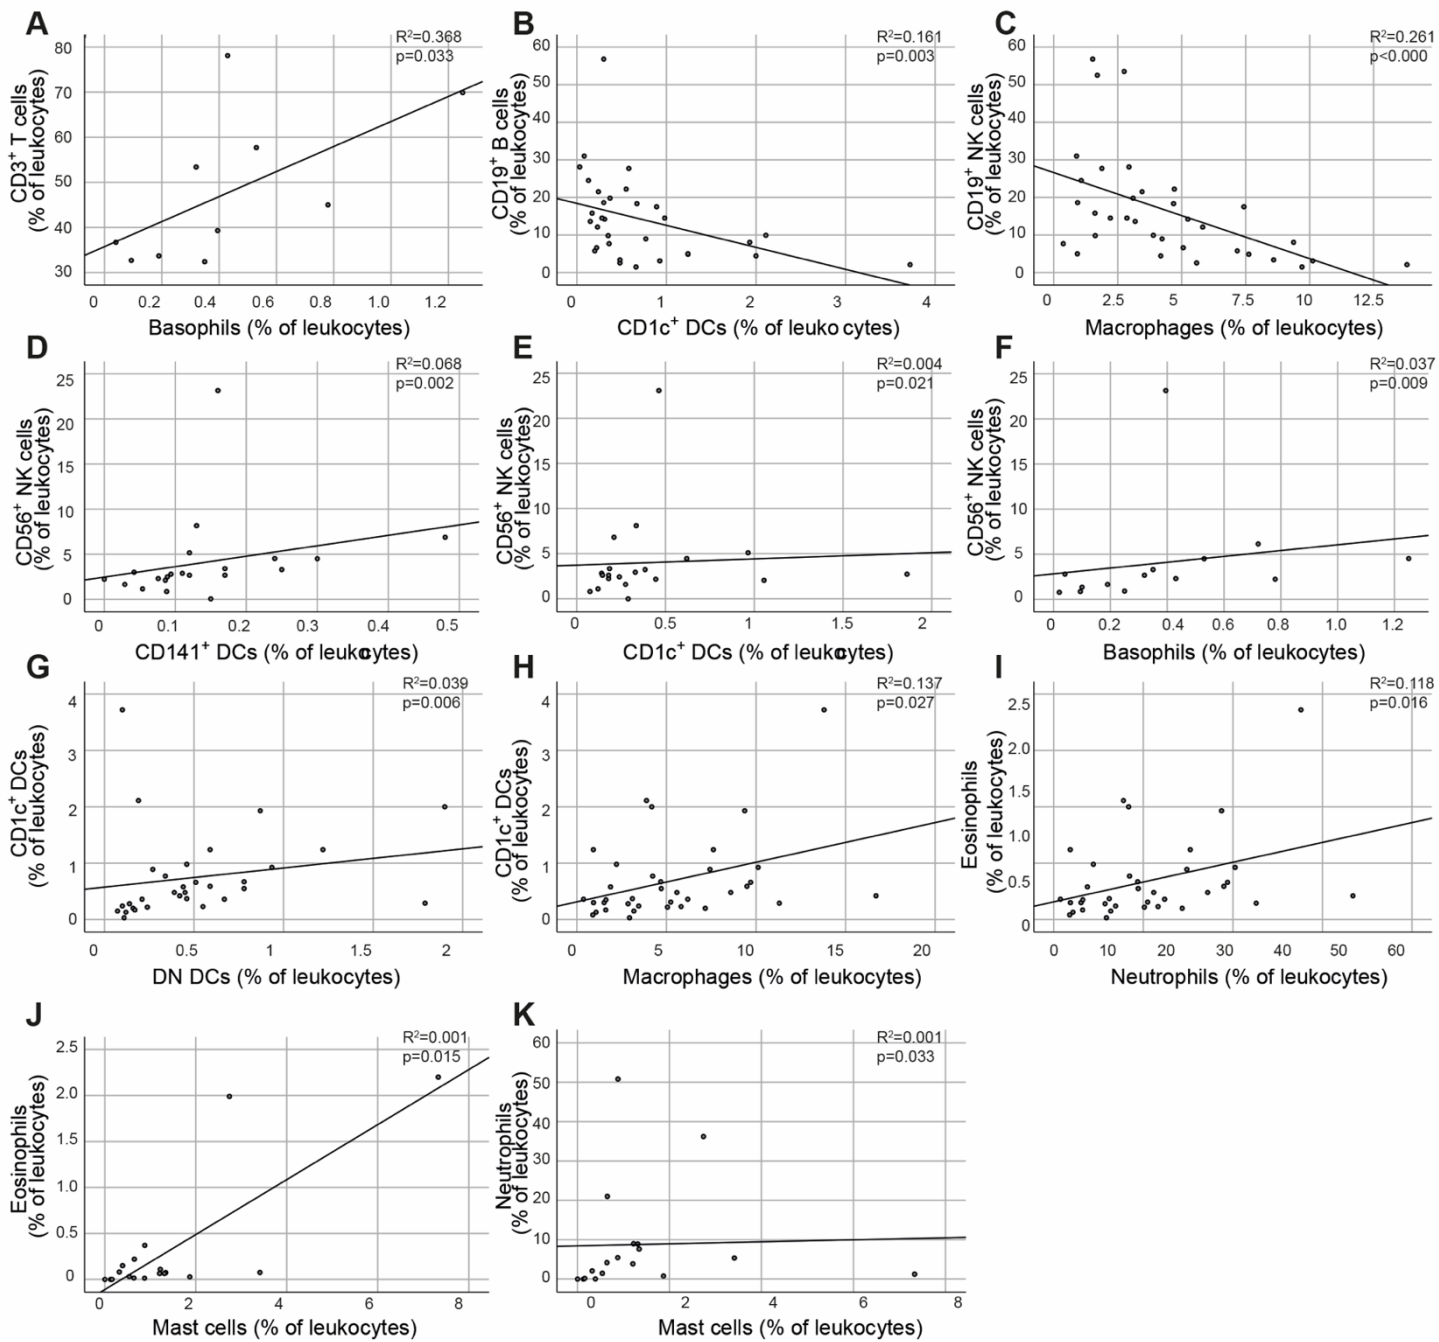

**Supplementary Figure 19. Linear regression analysis of immune cell infiltrates in NSCLC tumor.** Correlation of immune cell infiltrates in NSCLC tumor was analyzed by Spearman's rho and presented in Supplementary Table 7. Eleven combinations of immune cells showed significant correlation by Spearman's rho and were therefore further analyzed by regression analysis presented in the graphs (A-K). Significant p values suggest an association between the indicated immune cells. The analysis was performed by IBM SPSS version 25. Percentages of the immune cells used in the analysis were calculated from the live leukocyte population. Each symbol represents data from one NSCLC patient.

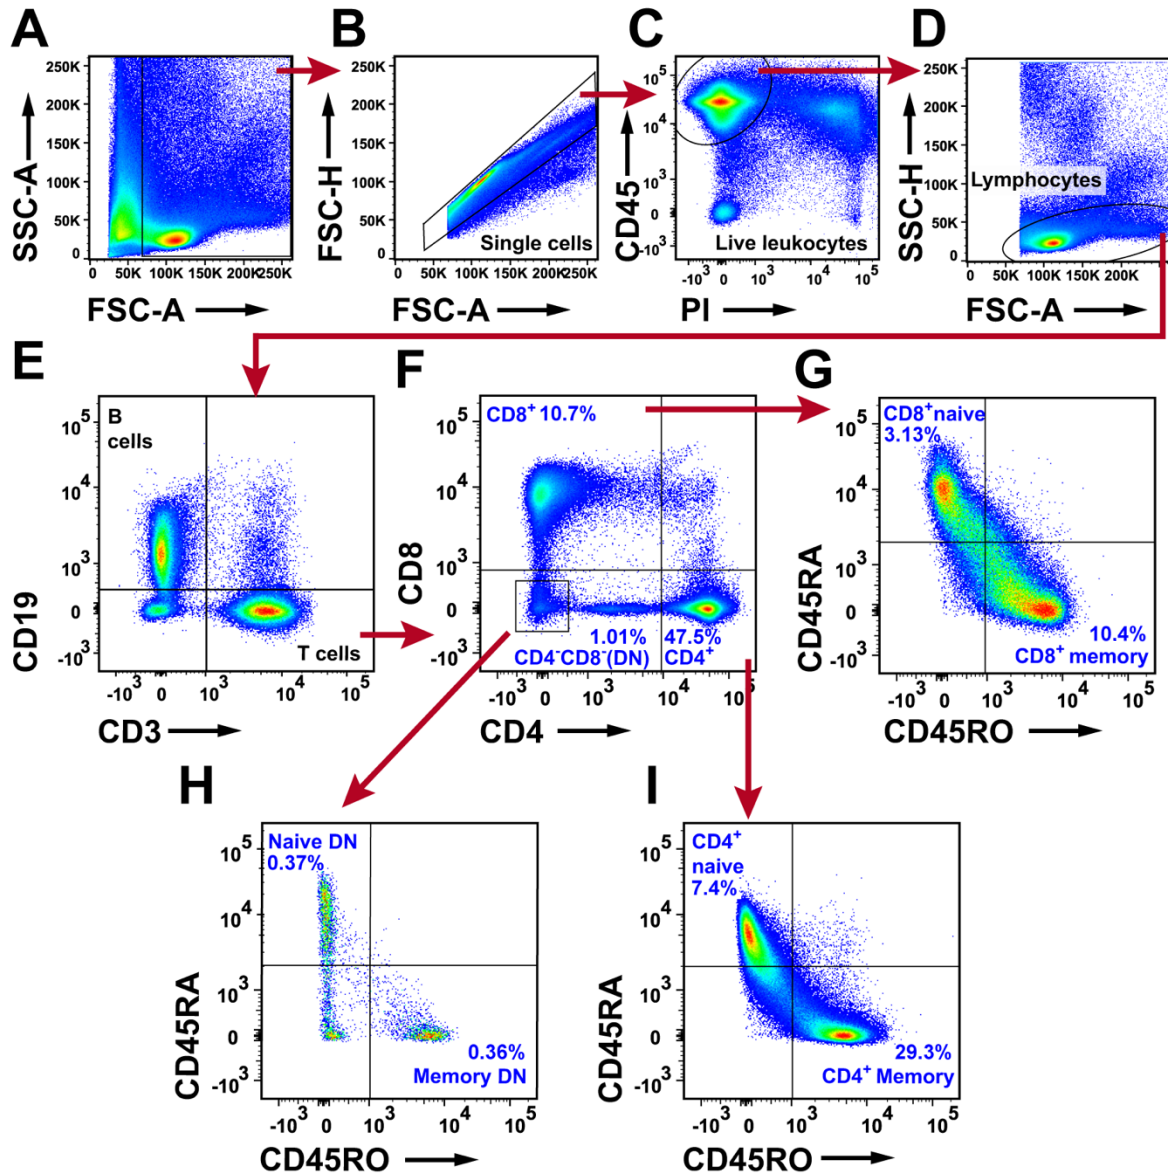

**Supplementary Figure 20. Flow cytometry analysis of T cells in lymph node from NSCLC patients.** (A) FSC-A and SSC-A were used to gate nucleated cells. (B) The FSC-A versus FSC-H plot was used to gate single cells. (C) Live leukocytes defined as CD45<sup>+</sup>PI<sup>-</sup> cells. (D) The lymphocyte gate. (E) T cells are defined as the CD19<sup>-</sup>CD3<sup>+</sup> population and were further divided in (F) CD4<sup>+</sup> population, CD8<sup>+</sup> population, and a CD4<sup>+</sup>CD8<sup>-</sup> population. Each subset was examined for expression of CD45RA and CD45RO in order to separate the cells into a CD45RA<sup>+</sup>CD45RO<sup>-</sup> naive phenotype and CD45RA<sup>-</sup>CD45RO<sup>+</sup> memory phenotype. (G) Naive/memory phenotyping of CD8<sup>+</sup> T cells. (H) Naive/memory phenotyping of CD4<sup>+</sup>CD8<sup>-</sup> T cells. (I) Naive/memory phenotyping of CD4<sup>+</sup> T cells. The percentage of each population was calculated from the total number of live leukocytes, and the indicated percentages are mean values of 26 NSCLC patients (adenocarcinoma n=15, and squamous cell carcinoma n=11). DN, CD4<sup>+</sup>CD8<sup>-</sup> double negative T cells.

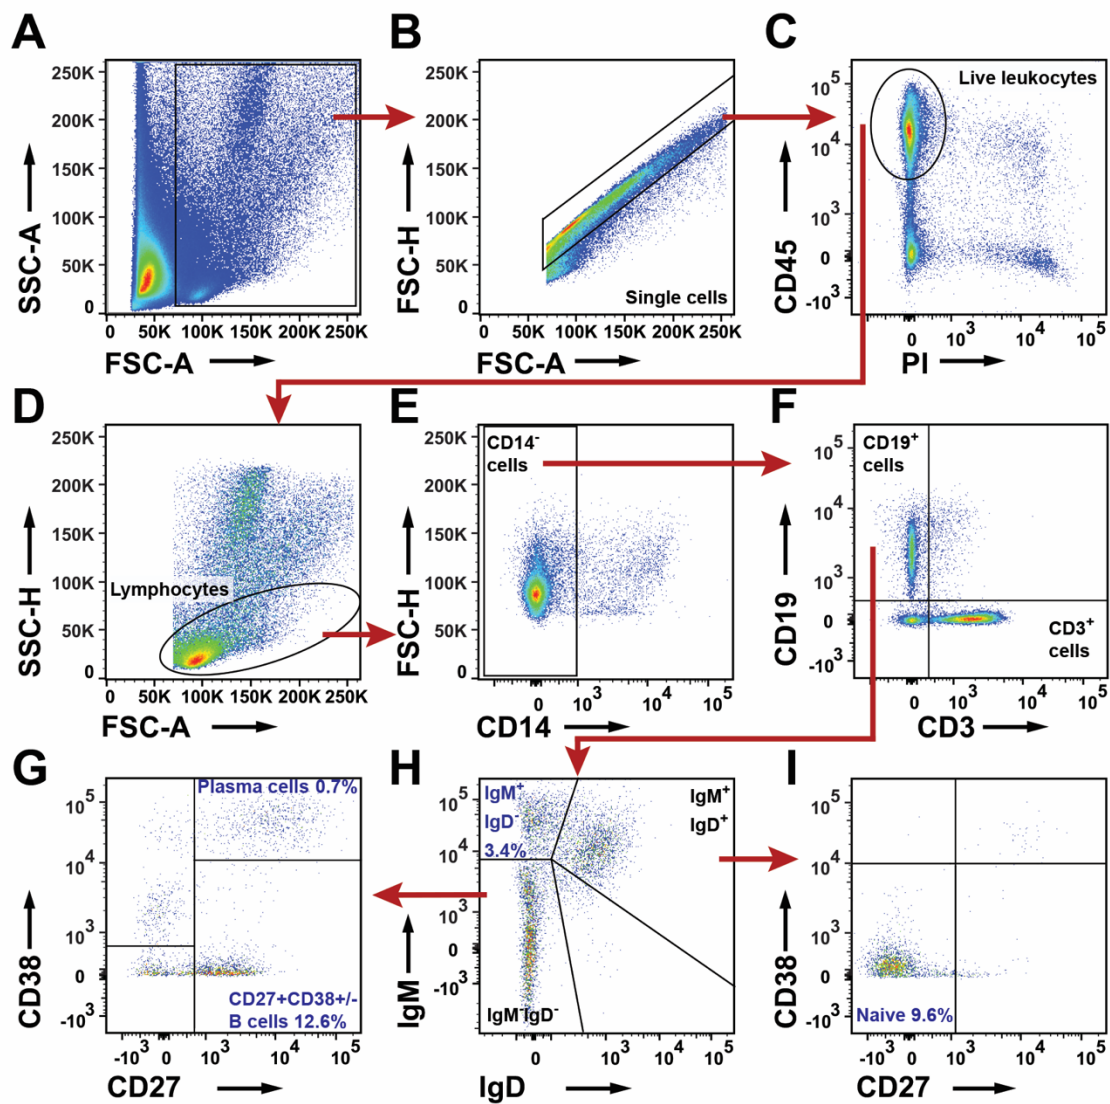

**Supplementary Figure 21. Flow cytometry analysis of B cells in lymph node from NSCLC patients.**

(A) FSC-A and SSC-A were used to gate nucleated cells. (B) An FSC-A versus FSC-H plot was used to exclude doublets and gate single cells. (C) Live leukocytes are defined as CD45<sup>+</sup>PI<sup>-</sup>. (D) A lymphocyte gate was set in an FSC and SSC plot. (E) Gate excluding CD14<sup>+</sup> cells. (F) B cell gate defining the B cells as CD19<sup>+</sup> and CD3<sup>-</sup>. (G) IgM<sup>-</sup>IgD<sup>-</sup>CD19<sup>+</sup> B cells could be separated into CD27<sup>+</sup>CD38<sup>+/-</sup> B cells and CD27<sup>+</sup>CD38<sup>++</sup> plasma cells. (H) Separation of CD19<sup>+</sup> B cells based on IgD and IgM expression. (I) Naive B cells are defined as CD27<sup>-</sup>CD38<sup>+/-</sup>. The proportions of B cell sub-populations indicated in the figure are percentages of the live leukocyte population and are mean values of 22 NSCLC patients (11 adenocarcinoma, and 11 squamous cell carcinoma).



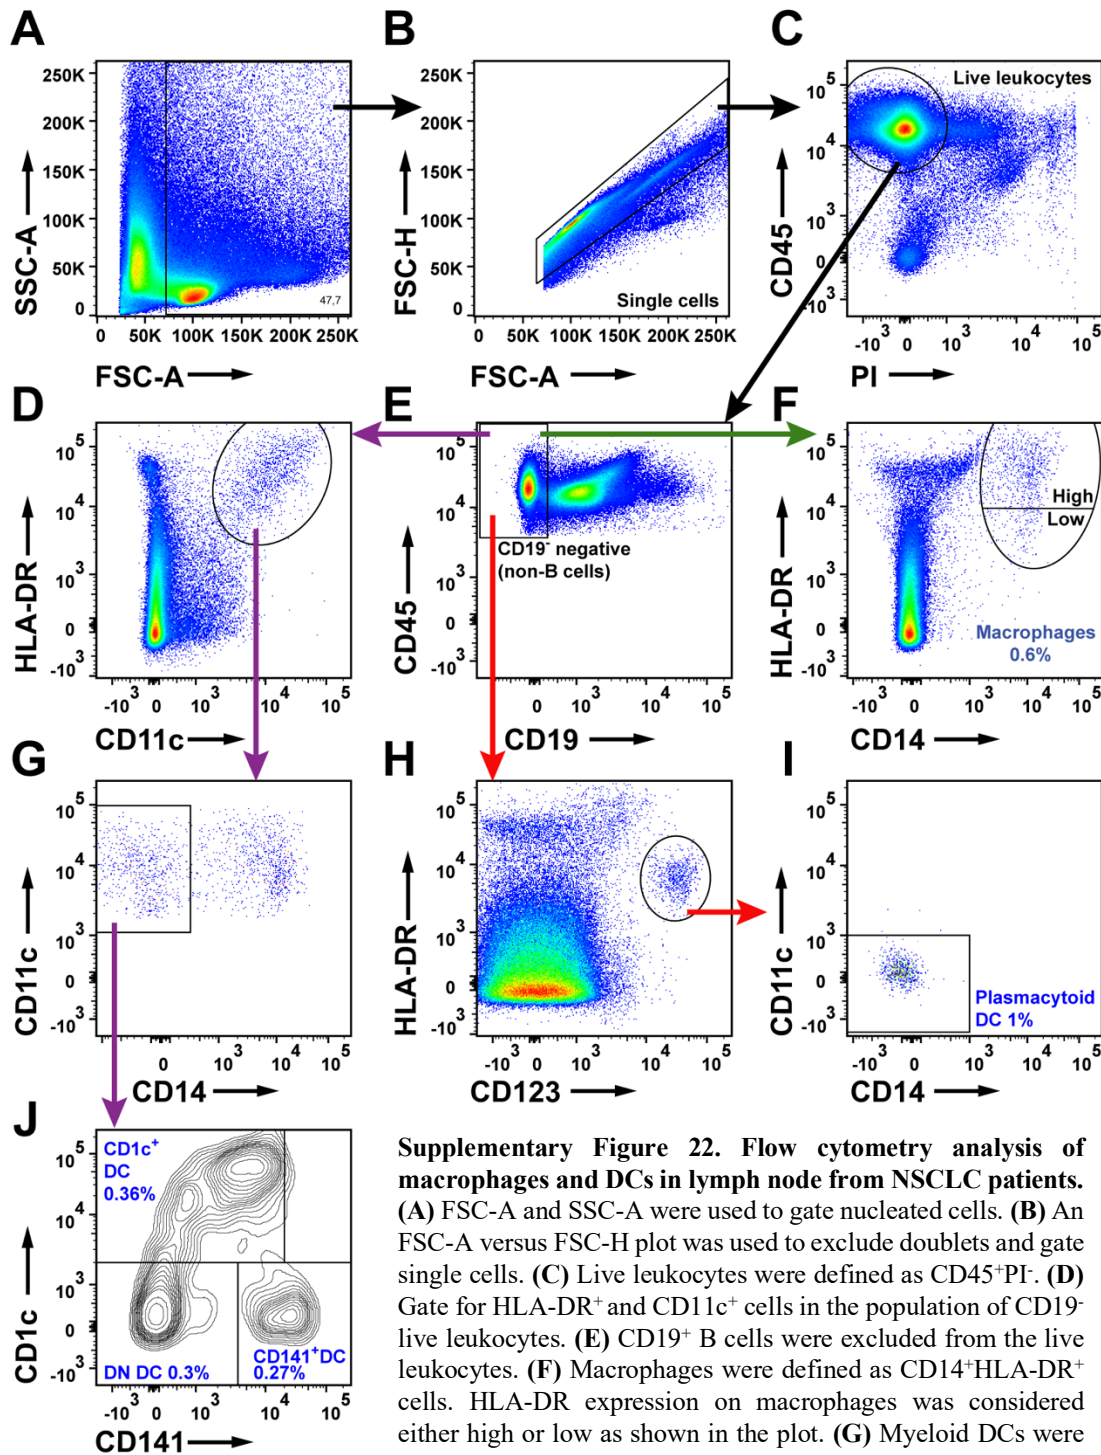

**Supplementary Figure 22. Flow cytometry analysis of macrophages and DCs in lymph node from NSCLC patients.** (A) FSC-A and SSC-A were used to gate nucleated cells. (B) An FSC-A versus FSC-H plot was used to exclude doublets and gate single cells. (C) Live leukocytes were defined as CD45<sup>+</sup>PI<sup>-</sup>. (D) Gate for HLA-DR<sup>+</sup> and CD11c<sup>+</sup> cells in the population of CD19<sup>-</sup> live leukocytes. (E) CD19<sup>+</sup> B cells were excluded from the live leukocytes. (F) Macrophages were defined as CD14<sup>+</sup>HLA-DR<sup>+</sup> cells. HLA-DR expression on macrophages was considered either high or low as shown in the plot. (G) Myeloid DCs were defined as CD11c<sup>+</sup>CD14<sup>+</sup>. (H) Plasmacytoid DCs are HLA-DR<sup>+</sup>CD123<sup>+</sup> and also (I) CD11c<sup>-</sup> and CD14<sup>-</sup>. (J) Two subsets of DCs were identified: CD141<sup>+</sup> DCs, and CD1c<sup>+</sup> DCs, in addition to a population of double negative (DN) cells. The percentage of each population was calculated from the total number of live leukocytes, and the indicated percentages are mean values of data from 26 NSCLC patients (14 adenocarcinoma, 11 squamous cell carcinoma, and 1 large cell carcinoma).

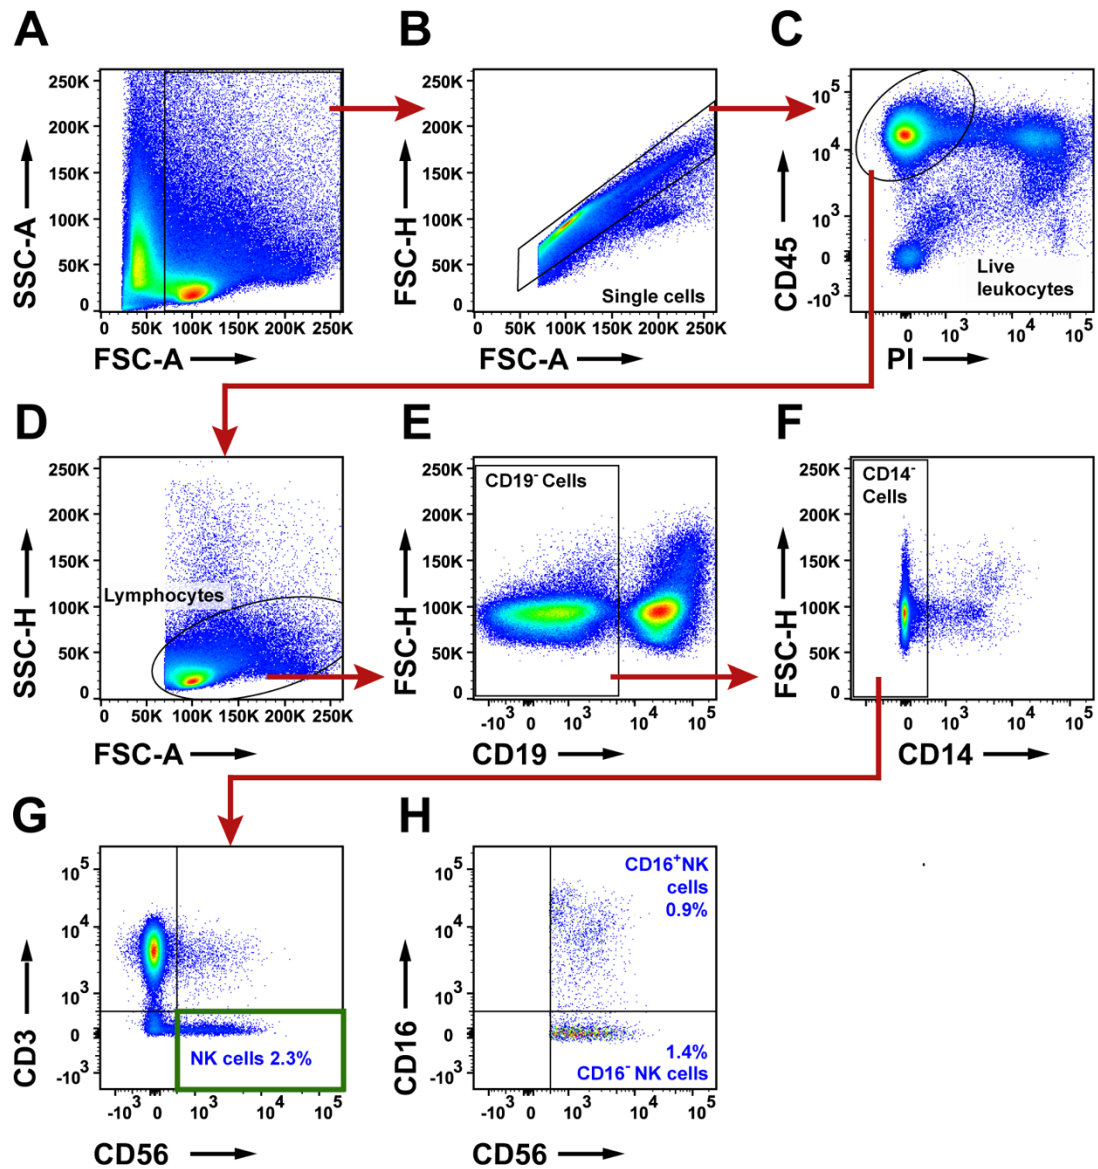

**Supplementary Figure 23. Flow cytometry analysis of NK cells in lymph node from NSCLC patients.** (A) FSC-A and SSC-A were used to exclude debris and gate nucleated cells. (B) An FSC-A versus FSC-H plot was used to exclude doublets and gate single cells. (C) Live leukocytes were defined as CD45<sup>+</sup>PI<sup>-</sup>. (D) Lymphocyte gate based on size and granularity. (E) CD19<sup>+</sup> B cells were excluded, and (F) CD14<sup>+</sup> macrophages were excluded from the gated lymphocytes. (G) NK cells are defined as CD3<sup>+</sup>CD56<sup>+</sup>. (H) Two NK cell subsets were identified: CD16<sup>+</sup> and CD16<sup>-</sup> NK cells. The percentages of the cell populations shown in the figure were calculated from the total number of live leukocytes and represent mean values from data of 17 NSCLC patients (10 adenocarcinoma, 7 squamous cell carcinoma).

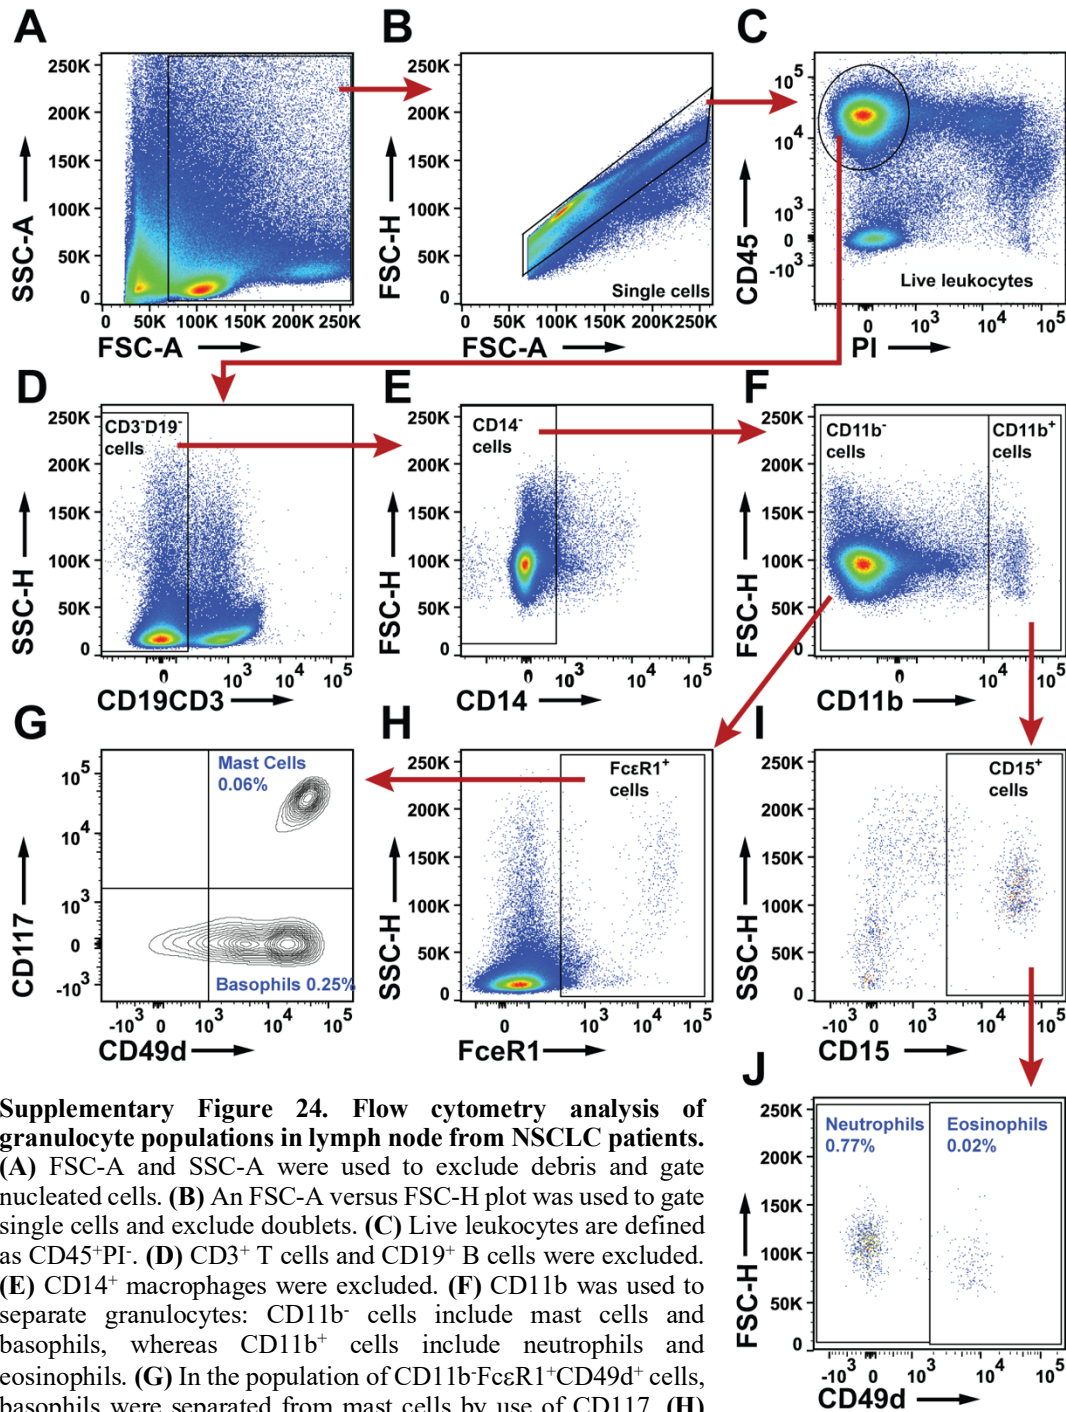

**Supplementary Figure 24. Flow cytometry analysis of granulocyte populations in lymph node from NSCLC patients.** (A) FSC-A and SSC-A were used to exclude debris and gate nucleated cells. (B) An FSC-A versus FSC-H plot was used to gate single cells and exclude doublets. (C) Live leukocytes are defined as CD45<sup>+</sup>PI<sup>-</sup>. (D) CD3<sup>+</sup>T cells and CD19<sup>+</sup>B cells were excluded. (E) CD14<sup>+</sup> macrophages were excluded. (F) CD11b was used to separate granulocytes: CD11b<sup>-</sup> cells include mast cells and basophils, whereas CD11b<sup>+</sup> cells include neutrophils and eosinophils. (G) In the population of CD11b<sup>-</sup>FcεR1<sup>+</sup>CD49d<sup>+</sup> cells, basophils were separated from mast cells by use of CD117. (H) Mast cells and basophils are both defined as FcεR1<sup>+</sup> cells. (I) Neutrophils and eosinophils are CD11b<sup>+</sup>CD15<sup>+</sup>. (J) Neutrophils are CD49<sup>-</sup> and eosinophils CD49<sup>+</sup>. The percentages indicated for the granulocyte populations were calculated from the total number of live leukocytes and are mean values of 16 NSCLC patients (9 adenocarcinoma and 7 squamous cell carcinoma).

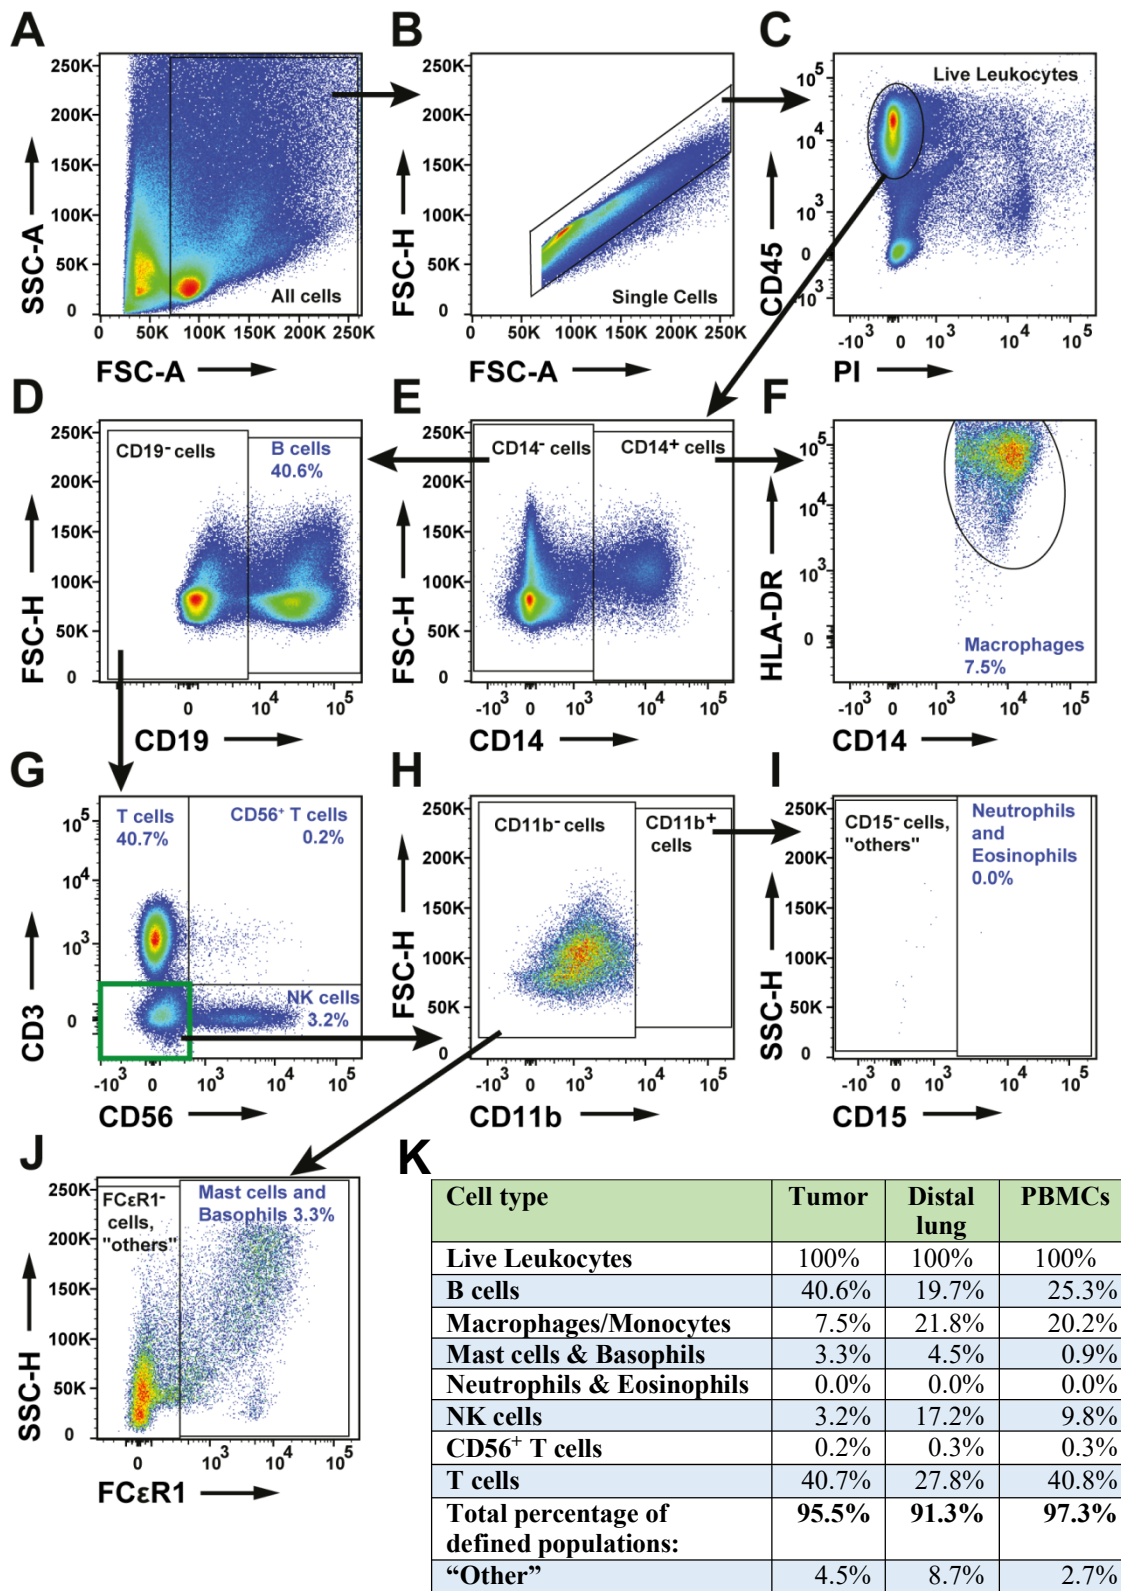

**Supplementary Figure 25. Flow cytometry analysis of “Other” population in NSCLC squamous cell carcinoma.** (A) The FSC-A versus SSC-A plot was used to gate nucleated cells. (B) FSC-A and FSC-H were used to gate single cells and exclude doublets. (C) Live leukocytes were defined as CD45<sup>+</sup>PI<sup>-</sup>. (D) CD14<sup>-</sup> leukocytes were examined for the expression of CD19. (E) Live leukocytes were separated into CD14<sup>-</sup> and CD14<sup>+</sup> populations. (F) Macrophages were defined as CD14<sup>+</sup>HLA-DR<sup>+</sup> cells. (G) CD3 and CD56 were used to define T cells (CD3<sup>+</sup>CD56<sup>-</sup>), CD56<sup>+</sup> T cells (CD3<sup>+</sup>CD56<sup>+</sup>), and NK cells (CD3<sup>-</sup>CD56<sup>+</sup>). (H) The CD3<sup>-</sup>CD56<sup>-</sup> population was separated based on CD11b expression. (I) The CD11b<sup>+</sup> population which expressed CD15 was defined as neutrophils and eosinophils. (J) The CD11b<sup>-</sup> cells which expressed FcεR1, were defined as mast cells and basophils. (K) Table presenting the proportions of immune cells as percentage of the live leukocyte population in a squamous cell carcinoma patient.

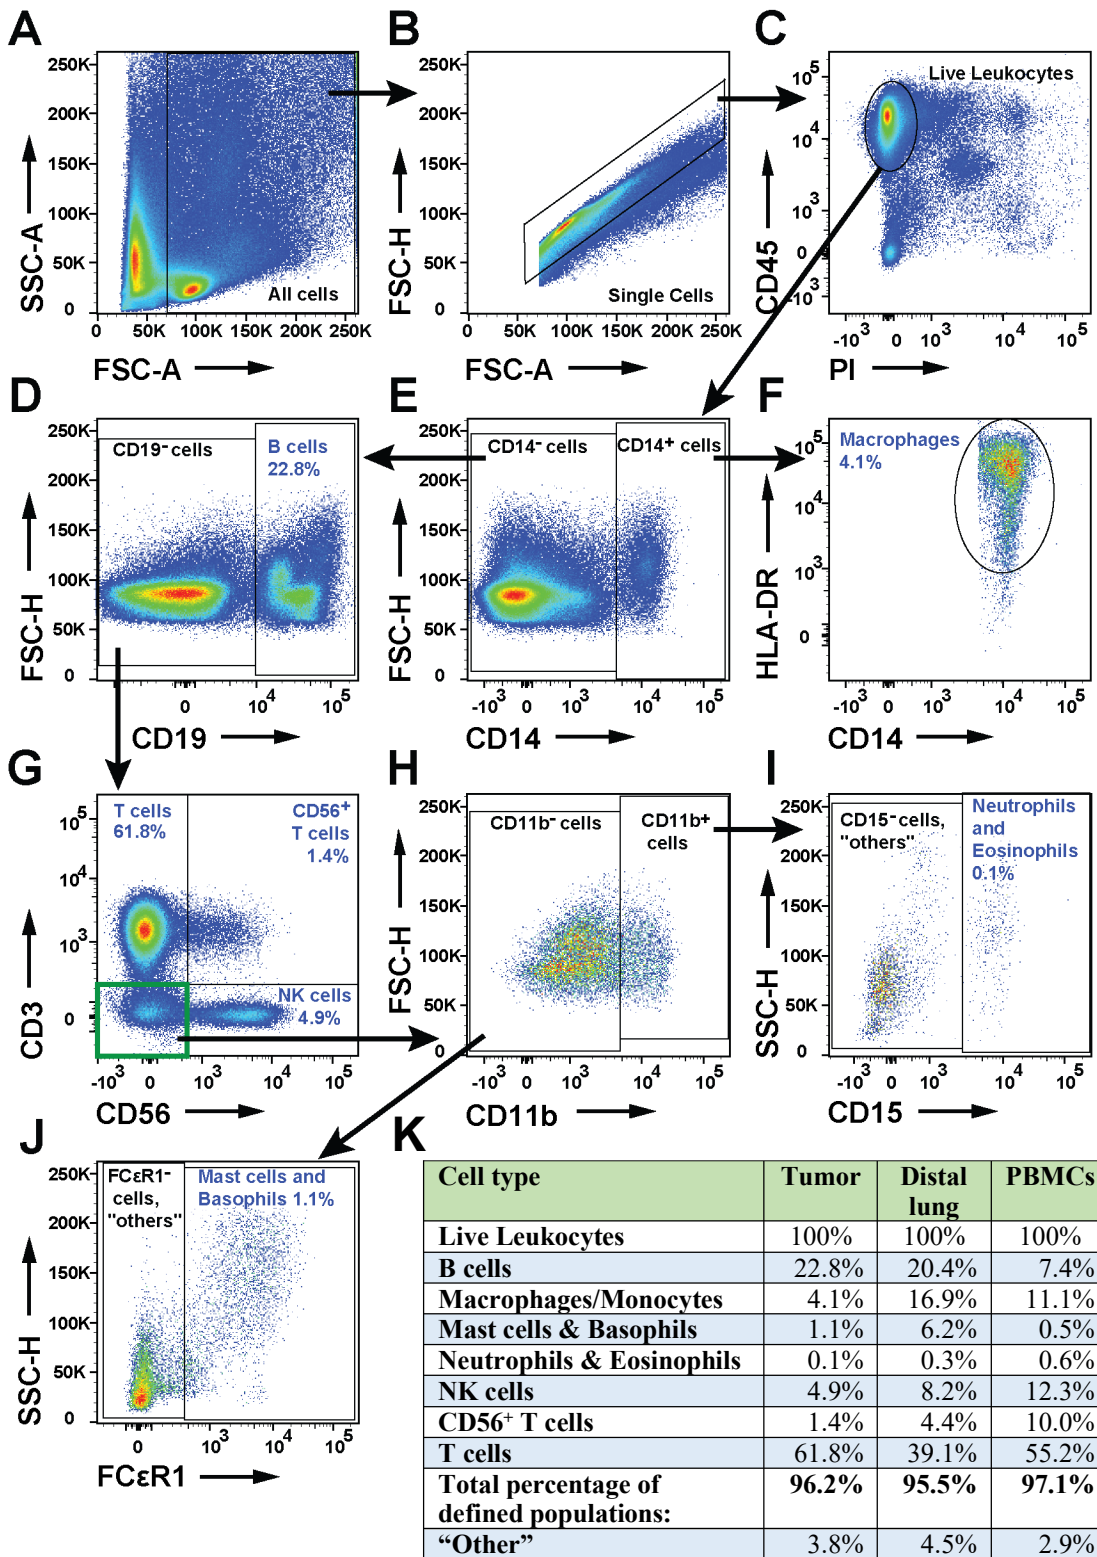

**Supplementary Figure 26. Flow cytometry analysis of "Other" population in NSCLC adenocarcinoma.** (A) The FSC-A versus SSC-A plot was used to gate nucleated cells. (B) FSC-A and FSC-H were used to gate single cells and exclude doublets. (C) Live leukocytes were defined as CD45<sup>+</sup>PI<sup>-</sup>. (D) CD14<sup>-</sup> leukocytes were examined for expression of CD19. (E) Live leukocytes were separated into CD14<sup>-</sup> and CD14<sup>+</sup> populations. (F) Macrophages were defined as CD14<sup>+</sup>HLA-DR<sup>+</sup> cells. (G) CD3 and CD56 were used to define T cells (CD3<sup>+</sup>CD56<sup>-</sup>), CD56<sup>+</sup> T cells (CD3<sup>+</sup>CD56<sup>+</sup>), and NK cells (CD3<sup>-</sup>CD56<sup>+</sup>). (H) The CD3<sup>-</sup>CD56<sup>-</sup> population was further separated based on CD11b expression. (I) The CD11b<sup>+</sup> population which expressed CD15 was defined as neutrophils and eosinophils. (J) The CD11b<sup>-</sup> cells which expressed FcεR1<sup>+</sup>, were defined as mast cells and basophils. (K) Table presenting the proportions of immune cells as percentage of the live leukocyte population in an adenocarcinoma patient.
